# Supplementary material for: Construction of a highly saturated Genetic Map for Vitis by Next-generation Restriction Site-associated DNA Sequencing
Source: BMC Plant Biol. 2018 Dec 12;18:347. doi: 10.1186/s12870-018-1575-z (PMC6291968; doi:10.1186/s12870-018-1575-z)
Supplement: Supplementary file 4 — Table S1. Markers used for mapping. (XLS 3199 kb) [file 12870_2018_1575_MOESM4_ESM.xls]

Marker name	Physical Position	Genetic position	Segretion type	Type	Sequence
chr1_12777	12777	0	lmxll	SNP	A
chr1_22966	22966	0.018800957	lmxll	SNP	A
chr1_22974	22974	0.244262514	lmxll	SNP	T
chr1_32223	32223	0.244262514	lmxll	SNP	A
chr1_33269	33269	0.244262514	lmxll	SNP	A
chr1_33421	33421	0.315343325	lmxll	SNP	C
chr1_60328	60328	0.315463267	nnxnp	SNP	G
chr1_61305	61305	0.334444138	nnxnp	SNP	A
chr1_61346	61346	0.33520877	nnxnp	SNP	T
chr1_61356	61356	0.347188008	lmxll	SNP	C
chr1_61385	61385	0.442437195	lmxll	INDEL	C
chr1_99566	99566	0.472992498	lmxll	SNP	T
chr1_99993	99993	0.501029013	lmxll	SNP	A
chr1_102952	102952	0.511793836	lmxll	SNP	T
chr1_104499	104499	0.511793836	lmxll	INDEL	A
chr1_107264	107264	0.511793836	lmxll	SNP	A
chr1_107293	107293	0.546667062	lmxll	SNP	G
chr1_119988	119988	0.546667062	lmxll	SNP	T
chr1_149736	149736	0.560385464	nnxnp	INDEL	A
chr1_151963	151963	0.589966236	nnxnp	INDEL	AT
chr1_155328	155328	0.589966236	nnxnp	SNP	A
chr1_155344	155344	0.740448856	lmxll	INDEL	A
chr1_187469	187469	0.766536309	nnxnp	SNP	T
chr1_187700	187700	0.766836165	nnxnp	SNP	C
chr1_196338	196338	1.16201609	lmxll	SNP	T
chr1_196363	196363	1.209378309	lmxll	SNP	G
chr1_206340	206340	1.209678165	lmxll	SNP	C
chr1_206585	206585	1.2254056	lmxll	SNP	T
chr1_208754	208754	1.225435586	lmxll	SNP	A
chr1_223268	223268	1.225435586	lmxll	SNP	G
chr1_226607	226607	1.251433082	lmxll	SNP	C
chr1_226649	226649	1.27744557	nnxnp	SNP	G
chr1_232425	232425	1.28497195	lmxll	SNP	T
chr1_259276	259276	1.301194147	nnxnp	SNP	A
chr1_259524	259524	1.318420862	nnxnp	SNP	T
chr1_259525	259525	1.318420862	nnxnp	SNP	T
chr1_261851	261851	1.349770783	nnxnp	SNP	C
chr1_261879	261879	1.426219012	nnxnp	SNP	G
chr1_268509	268509	1.431706373	nnxnp	SNP	G
chr1_294575	294575	1.455320015	nnxnp	INDEL	T
chr1_299710	299710	1.45921814	nnxnp	SNP	A
chr1_304788	304788	1.479533369	nnxnp	SNP	G
chr1_304791	304791	1.516715485	nnxnp	SNP	G
chr1_313081	313081	1.516715485	nnxnp	SNP	A
chr1_313168	313168	1.534841767	nnxnp	SNP	T
chr1_319594	319594	1.5526532	nnxnp	SNP	T,*
chr1_320228	320228	1.573388227	nnxnp	INDEL	T
chr1_320235	320235	1.573388227	nnxnp	INDEL	G
chr1_337168	337168	1.573388227	nnxnp	SNP	A
chr1_337216	337216	1.594018304	nnxnp	INDEL	A
chr1_337220	337220	1.594018304	nnxnp	INDEL	C
chr1_337225	337225	1.594018304	nnxnp	SNP	C
chr1_337231	337231	1.610375436	nnxnp	INDEL	ATGG
chr1_337233	337233	1.692251055	nnxnp	INDEL	TTTAA
chr1_373648	373648	1.692251055	nnxnp	SNP	T
chr1_378341	378341	1.692251055	nnxnp	SNP	A
chr1_378348	378348	1.692251055	nnxnp	SNP	C
chr1_393944	393944	1.710722171	nnxnp	SNP	C
chr1_394050	394050	1.710722171	nnxnp	SNP	G
chr1_422093	422093	1.738593765	nnxnp	SNP	G
chr1_422094	422094	1.738593765	nnxnp	SNP	C
chr1_427527	427527	1.738593765	nnxnp	SNP	T
chr1_449331	449331	1.738593765	nnxnp	SNP	T
chr1_449686	449686	1.738593765	nnxnp	SNP	A
chr1_461601	461601	1.759973482	nnxnp	SNP	A
chr1_462560	462560	1.804082267	nnxnp	SNP	C
chr1_462567	462567	1.943425245	nnxnp	SNP	C
chr1_462620	462620	1.943425245	nnxnp	SNP	C
chr1_476822	476822	2.25124219	nnxnp	SNP	G
chr1_477104	477104	2.262366839	nnxnp	SNP	A
chr1_494357	494357	2.307450155	nnxnp	SNP	T
chr1_518845	518845	2.526584755	nnxnp	SNP	T
chr1_530041	530041	2.526584755	nnxnp	SNP	A
chr1_535694	535694	2.561113147	nnxnp	SNP	C
chr1_535697	535697	2.56591084	nnxnp	SNP	C
chr1_535731	535731	2.57838484	nnxnp	SNP	C
chr1_535744	535744	2.593317657	nnxnp	SNP	T
chr1_538860	538860	2.593362636	lmxll	SNP	A
chr1_552021	552021	2.674638543	nnxnp	SNP	C
chr1_552048	552048	2.717203071	nnxnp	INDEL	GT
chr1_559951	559951	2.717203071	nnxnp	SNP	A
chr1_559963	559963	2.726378657	nnxnp	SNP	A
chr1_559973	559973	2.754250252	nnxnp	SNP	C
chr1_562349	562349	2.754250252	nnxnp	SNP	T
chr1_563902	563902	2.783126363	nnxnp	SNP	T
chr1_575725	575725	2.815645721	nnxnp	SNP	T
chr1_599109	599109	2.859364693	nnxnp	INDEL	G
chr1_599140	599140	2.884822449	nnxnp	SNP	C
chr1_606566	606566	2.884822449	nnxnp	SNP	C
chr1_612484	612484	3.26192107	nnxnp	SNP	A
chr1_612523	612523	3.262325876	nnxnp	SNP	C
chr1_617483	617483	3.281231782	nnxnp	SNP	T
chr1_653955	653955	3.683983066	nnxnp	SNP	A
chr1_653992	653992	3.734283872	nnxnp	SNP	C
chr1_654120	654120	3.734283872	nnxnp	SNP	G
chr1_654190	654190	3.752754987	nnxnp	SNP	T
chr1_654194	654194	3.780911445	nnxnp	SNP	T
chr1_656346	656346	3.780911445	nnxnp	SNP	C
chr1_688814	688814	3.795664349	nnxnp	SNP	A
chr1_688829	688829	3.805814467	nnxnp	SNP	C
chr1_688831	688831	3.810627152	nnxnp	SNP	T
chr1_688838	688838	3.812351323	nnxnp	SNP	T
chr1_688851	688851	3.813430803	nnxnp	SNP	T
chr1_688868	688868	3.816579289	nnxnp	SNP	C
chr1_690062	690062	3.820282508	nnxnp	SNP	C
chr1_693171	693171	3.82765896	nnxnp	SNP	T
chr1_693216	693216	3.832726522	nnxnp	SNP	A
chr1_705765	705765	3.832726522	nnxnp	SNP	T
chr1_716289	716289	3.832726522	nnxnp	SNP	A
chr1_716659	716659	3.832726522	nnxnp	SNP	C
chr1_753980	753980	3.832726522	nnxnp	SNP	G
chr1_756698	756698	3.849008691	nnxnp	SNP	T
chr1_815981	815981	3.849158619	nnxnp	SNP	C
chr1_815991	815991	3.89427192	nnxnp	SNP	G
chr1_865702	865702	3.89427192	nnxnp	SNP	G
chr1_874239	874239	3.931648942	nnxnp	SNP	G
chr1_874505	874505	3.931648942	nnxnp	SNP	C
chr1_901696	901696	3.931648942	nnxnp	INDEL	C
chr1_902628	902628	3.974738217	hkxhk	SNP	G
chr1_920085	920085	4.010840852	nnxnp	SNP	G
chr1_926157	926157	4.053495336	nnxnp	SNP	A
chr1_926981	926981	4.053495336	hkxhk	SNP	A
chr1_927062	927062	4.090872359	nnxnp	SNP	A
chr1_935107	935107	4.124920982	lmxll	SNP	A
chr1_935133	935133	4.146675518	lmxll	SNP	A
chr1_935427	935427	4.146675518	hkxhk	SNP	C
chr1_946705	946705	4.218895782	nnxnp	SNP	G
chr1_960810	960810	4.22141457	nnxnp	SNP	G
chr1_963323	963323	4.265613311	nnxnp	SNP	C
chr1_966801	966801	4.280366215	nnxnp	INDEL	GTTCCAAA
chr1_966832	966832	4.280366215	nnxnp	SNP	G
chr1_966878	966878	4.298837331	hkxhk	SNP	A
chr1_968682	968682	4.298837331	nnxnp	SNP	T
chr1_968684	968684	4.298837331	nnxnp	SNP	A
chr1_969702	969702	4.331551596	nnxnp	SNP	T
chr1_969729	969729	4.375315546	nnxnp	SNP	G
chr1_969795	969795	4.379753412	nnxnp	SNP	T
chr1_972769	972769	4.424296987	hkxhk	SNP	G,C
chr1_973172	973172	4.450414425	hkxhk	SNP	C
chr1_973209	973209	4.48780644	hkxhk	SNP	T
chr1_973358	973358	4.48780644	hkxhk	SNP	G,A
chr1_973720	973720	4.51011571	hkxhk	SNP	C,G
chr1_973745	973745	4.534119164	hkxhk	SNP	A
chr1_973775	973775	4.575334341	hkxhk	SNP	A
chr1_974029	974029	4.579967112	lmxll	SNP	C
chr1_974039	974039	4.611107134	lmxll	SNP	T
chr1_974093	974093	4.611107134	lmxll	SNP	T
chr1_1002692	1002692	4.623386228	nnxnp	SNP	T
chr1_1005976	1005976	4.626369793	nnxnp	SNP	C
chr1_1006005	1006005	4.669114234	nnxnp	SNP	A
chr1_1009145	1009145	4.669114234	nnxnp	SNP	G
chr1_1088265	1088265	4.669114234	nnxnp	SNP	T
chr1_1088266	1088266	4.793884222	nnxnp	SNP	A
chr1_1088294	1088294	4.808307284	nnxnp	SNP	A
chr1_1088305	1088305	4.863045956	nnxnp	SNP	T
chr1_1088307	1088307	4.88156205	nnxnp	SNP	T
chr1_1088316	1088316	4.88156205	nnxnp	SNP	A
chr1_1088317	1088317	4.918939072	nnxnp	SNP	T
chr1_1106833	1106833	4.918939072	nnxnp	SNP	A
chr1_1210929	1210929	4.963002878	nnxnp	SNP	T,A
chr1_1210941	1210941	5.052809683	nnxnp	SNP	A
chr1_1220500	1220500	5.052809683	nnxnp	SNP	G
chr1_1235540	1235540	5.052809683	nnxnp	SNP	G
chr1_1235561	1235561	5.067367681	nnxnp	SNP	T
chr1_1235781	1235781	5.128283381	nnxnp	SNP	G
chr1_1235817	1235817	5.12832836	nnxnp	SNP	C
chr1_1240950	1240950	5.156199954	nnxnp	SNP	G
chr1_1248889	1248889	5.184071548	nnxnp	SNP	G
chr1_1248892	1248892	5.184071548	nnxnp	SNP	T
chr1_1249063	1249063	5.184071548	nnxnp	SNP	T
chr1_1249078	1249078	5.225196768	nnxnp	SNP	A
chr1_1249080	1249080	5.229184849	nnxnp	SNP	G
chr1_1249140	1249140	5.290790218	nnxnp	SNP	T
chr1_1249143	1249143	5.290790218	nnxnp	SNP	T
chr1_1254842	1254842	5.290790218	nnxnp	SNP	T
chr1_1254888	1254888	5.299980798	nnxnp	SNP	G
chr1_1275102	1275102	5.313159459	nnxnp	SNP	G
chr1_1294200	1294200	5.315888146	nnxnp	SNP	G
chr1_1304026	1304026	5.36746334	nnxnp	SNP	T
chr1_1305976	1305976	5.368497842	nnxnp	SNP	A
chr1_1308158	1308158	5.369337438	nnxnp	SNP	A
chr1_1314752	1314752	5.370057092	nnxnp	SNP	A
chr1_1314779	1314779	5.370371941	nnxnp	SNP	C
chr1_1314833	1314833	5.370926674	nnxnp	SNP	A
chr1_1314851	1314851	5.479054666	nnxnp	SNP	C
chr1_1316455	1316455	5.519220347	nnxnp	SNP	G
chr1_1317028	1317028	5.519220347	lmxll	SNP	T
chr1_1318329	1318329	5.544723081	lmxll	SNP	T
chr1_1318402	1318402	5.545607655	hkxhk	SNP	C
chr1_1337843	1337843	5.586627925	nnxnp	SNP	G
chr1_1343898	1343898	5.587497507	nnxnp	SNP	T
chr1_1344102	1344102	5.588037247	nnxnp	SNP	T
chr1_1344165	1344165	5.588262139	nnxnp	SNP	A
chr1_1349737	1349737	5.588397074	hkxhk	SNP	G
chr1_1349738	1349738	5.588711923	hkxhk	SNP	A
chr1_1353974	1353974	5.588936815	nnxnp	SNP	G
chr1_1353997	1353997	5.744382048	nnxnp	SNP	C
chr1_1360815	1360815	5.763542832	lmxll	SNP	G
chr1_1367183	1367183	5.779825001	lmxll	SNP	G
chr1_1372295	1372295	5.779825001	nnxnp	SNP	C
chr1_1375849	1375849	5.787906114	nnxnp	SNP	T
chr1_1379751	1379751	5.817396929	hkxhk	SNP	G
chr1_1383147	1383147	5.837052475	nnxnp	SNP	T
chr1_1383179	1383179	5.837052475	nnxnp	SNP	G
chr1_1383408	1383408	5.847502449	nnxnp	SNP	G
chr1_1383420	1383420	5.877982788	nnxnp	SNP	T
chr1_1384903	1384903	5.877982788	hkxhk	SNP	C
chr1_1387615	1387615	5.88847774	lmxll	SNP	A
chr1_1400565	1400565	5.918928094	nnxnp	SNP	T
chr1_1400688	1400688	5.918928094	nnxnp	INDEL	A
chr1_1400718	1400718	5.918928094	nnxnp	SNP	C
chr1_1405818	1405818	5.918928094	lmxll	SNP	T
chr1_1413390	1413390	5.968914052	lmxll	SNP	T
chr1_1413483	1413483	5.968914052	lmxll	SNP	T
chr1_1424766	1424766	5.968914052	lmxll	SNP	G
chr1_1424773	1424773	5.98621573	lmxll	SNP	G
chr1_1424779	1424779	6.01557161	nnxnp	SNP	T
chr1_1424834	1424834	6.019244844	nnxnp	SNP	C
chr1_1424839	1424839	6.029290012	nnxnp	SNP	A
chr1_1424852	1424852	6.030774298	nnxnp	SNP	T
chr1_1424856	1424856	6.049275399	nnxnp	SNP	G
chr1_1426979	1426979	6.100865585	lmxll	SNP	C
chr1_1428286	1428286	6.119321708	lmxll	SNP	A
chr1_1430592	1430592	6.119321708	nnxnp	SNP	G
chr1_1430622	1430622	6.119321708	nnxnp	SNP	G
chr1_1452818	1452818	6.119321708	lmxll	SNP	C
chr1_1452829	1452829	6.127867598	lmxll	SNP	C
chr1_1452897	1452897	6.330899943	lmxll	SNP	A
chr1_1453040	1453040	6.330899943	nnxnp	INDEL	CTA
chr1_1453087	1453087	6.347182111	nnxnp	INDEL	CAA,CA,CAAA
chr1_1453124	1453124	6.347182111	nnxnp	SNP	T
chr1_1457727	1457727	6.388592194	lmxll	INDEL	C
chr1_1457803	1457803	6.388592194	lmxll	SNP	T
chr1_1458025	1458025	6.418862634	lmxll	SNP	A
chr1_1460367	1460367	6.429522507	lmxll	SNP	A
chr1_1469557	1469557	6.429522507	nnxnp	SNP	G
chr1_1470404	1470404	6.429522507	nnxnp	SNP	A
chr1_1470432	1470432	6.492582176	nnxnp	SNP	A
chr1_1478564	1478564	6.512777463	lmxll	SNP	A
chr1_1479211	1479211	6.537530557	nnxnp	SNP	T
chr1_1479225	1479225	6.537530557	lmxll	SNP	T
chr1_1479242	1479242	6.537530557	hkxhk	SNP	A
chr1_1494549	1494549	6.55690124	lmxll	SNP	G
chr1_1494920	1494920	6.586676918	nnxnp	SNP	A
chr1_1496163	1496163	6.586676918	lmxll	SNP	T
chr1_1496206	1496206	6.619601082	nnxnp	SNP	G
chr1_1496225	1496225	6.619601082	nnxnp	SNP	A
chr1_1498956	1498956	6.635883251	lmxll	SNP	T
chr1_1504188	1504188	6.635883251	lmxll	INDEL	CGGCGCTCAAGAGAAGA,CGACGGTCAAGAGAAGA
chr1_1504216	1504216	6.739648342	lmxll	SNP	G
chr1_1504436	1504436	6.764206529	nnxnp	SNP	C
chr1_1504456	1504456	6.764206529	nnxnp	SNP	T
chr1_1504492	1504492	6.788749725	lmxll	SNP	T
chr1_1508194	1508194	6.805031893	nnxnp	SNP	C
chr1_1508218	1508218	6.805031893	nnxnp	SNP	A
chr1_1510093	1510093	6.805031893	hkxhk	SNP	T
chr1_1512664	1512664	6.971931617	nnxnp	SNP	T
chr1_1523004	1523004	7.033806856	nnxnp	SNP	A
chr1_1528248	1528248	7.043282299	nnxnp	SNP	A
chr1_1528249	1528249	7.043282299	nnxnp	SNP	C
chr1_1528263	1528263	7.061933328	nnxnp	SNP	T
chr1_1528295	1528295	7.155878142	nnxnp	SNP	T
chr1_1530208	1530208	7.155878142	nnxnp	SNP	G,T
chr1_1530241	1530241	7.200916479	nnxnp	SNP	A
chr1_1530258	1530258	7.229477742	nnxnp	SNP	G
chr1_1530259	1530259	7.229477742	nnxnp	INDEL	T
chr1_1540638	1540638	7.317335484	nnxnp	SNP	A
chr1_1543065	1543065	7.354097802	lmxll	SNP	G
chr1_1543134	1543134	7.354097802	hkxhk	INDEL	G
chr1_1545846	1545846	7.378461083	nnxnp	SNP	G
chr1_1547606	1547606	7.378461083	hkxhk	SNP	C
chr1_1548052	1548052	7.378461083	lmxll	SNP	A
chr1_1548077	1548077	7.402824365	lmxll	SNP	G
chr1_1548081	1548081	7.442840118	lmxll	SNP	T
chr1_1552107	1552107	7.542017415	nnxnp	INDEL	AT
chr1_1552514	1552514	7.615377131	nnxnp	SNP	C
chr1_1552696	1552696	7.615377131	lmxll	SNP	C
chr1_1553661	1553661	7.668916379	nnxnp	SNP	G
chr1_1553688	1553688	7.695138767	nnxnp	SNP	T
chr1_1556691	1556691	7.713355005	lmxll	SNP	T
chr1_1556708	1556708	7.742785849	lmxll	SNP	C
chr1_1558431	1558431	7.747433614	nnxnp	SNP	A,T
chr1_1569417	1569417	7.800538071	lmxll	SNP	G
chr1_1569454	1569454	7.814961134	nnxnp	SNP	C
chr1_1569656	1569656	7.868065592	hkxhk	SNP	T
chr1_1571148	1571148	7.916297393	lmxll	INDEL	AG
chr1_1571149	1571149	7.998997616	lmxll	SNP	A
chr1_1571583	1571583	7.999297471	lmxll	SNP	A
chr1_1571627	1571627	8.076930131	lmxll	SNP	C
chr1_1574639	1574639	8.211355475	nnxnp	SNP	A
chr1_1574657	1574657	8.218012273	nnxnp	SNP	C
chr1_1575081	1575081	8.218012273	lmxll	SNP	G
chr1_1578772	1578772	8.218012273	lmxll	SNP	G
chr1_1580597	1580597	8.28847838	lmxll	SNP	C
chr1_1583743	1583743	8.394537368	lmxll	INDEL	C
chr1_1583747	1583747	8.394537368	lmxll	SNP	A
chr1_1583749	1583749	8.745068768	lmxll	INDEL	A
chr1_1587443	1587443	8.87034851	lmxll	SNP	T
chr1_1589852	1589852	8.873916794	lmxll	SNP	G
chr1_1593313	1593313	8.92916522	lmxll	SNP	C
chr1_1597076	1597076	8.93550717	lmxll	SNP	A
chr1_1597274	1597274	8.988926476	lmxll	SNP	G
chr1_1597278	1597278	9.04297548	lmxll	SNP	A
chr1_1597476	1597476	9.04297548	nnxnp	SNP	A
chr1_1597573	1597573	9.04297548	lmxll	SNP	A
chr1_1611736	1611736	9.387494772	nnxnp	SNP	T
chr1_1611764	1611764	9.415696207	nnxnp	SNP	A
chr1_1615411	1615411	9.427015763	lmxll	SNP	C
chr1_1625281	1625281	9.438515232	lmxll	INDEL	A
chr1_1630478	1630478	9.452578467	lmxll	SNP	C
chr1_1652329	1652329	9.461873996	lmxll	SNP	C
chr1_1662716	1662716	9.469625268	lmxll	SNP	G
chr1_1662778	1662778	9.477061691	lmxll	SNP	C
chr1_1662991	1662991	9.483763468	lmxll	SNP	T
chr1_1667245	1667245	9.501529923	lmxll	SNP	A
chr1_1667251	1667251	9.516687632	nnxnp	SNP	G
chr1_1668568	1668568	9.615715001	nnxnp	SNP	A
chr1_1668587	1668587	9.704247419	hkxhk	SNP	T
chr1_1672786	1672786	9.717021275	nnxnp	SNP	G
chr1_1672798	1672798	9.830726584	nnxnp	SNP	G
chr1_1676258	1676258	9.888703698	hkxhk	SNP	C
chr1_1676268	1676268	10.02061025	hkxhk	SNP	G
chr1_1676380	1676380	10.02061025	hkxhk	SNP	T
chr1_1676431	1676431	10.05470386	nnxnp	SNP	T
chr1_1676487	1676487	10.06197536	lmxll	INDEL	A
chr1_1686569	1686569	10.06719285	nnxnp	SNP	G
chr1_1695038	1695038	10.11902292	nnxnp	SNP	C
chr1_1695125	1695125	10.13914324	nnxnp	SNP	G
chr1_1695126	1695126	10.13914324	nnxnp	SNP	A
chr1_1698834	1698834	10.13914324	lmxll	SNP	T
chr1_1698839	1698839	10.14801897	lmxll	SNP	C
chr1_1706412	1706412	10.14801897	efxeg	INDEL	AATAAAT,AAT
chr1_1707908	1707908	10.14801897	lmxll	SNP	G
chr1_1723698	1723698	10.1781095	lmxll	SNP	G
chr1_1726426	1726426	10.18014852	lmxll	SNP	C
chr1_1726452	1726452	10.24160396	lmxll	SNP	G
chr1_1726500	1726500	10.24160396	lmxll	SNP	A
chr1_1729689	1729689	10.25079454	nnxnp	SNP	A
chr1_1729690	1729690	10.60149086	nnxnp	SNP	A
chr1_1744628	1744628	10.60149086	lmxll	SNP	A
chr1_1744694	1744694	11.17641933	lmxll	SNP	A
chr1_1746664	1746664	11.1766892	nnxnp	INDEL	T
chr1_1746688	1746688	11.31136942	lmxll	SNP	G
chr1_1746695	1746695	11.33280911	nnxnp	SNP	T
chr1_1746746	1746746	11.36598815	lmxll	SNP	G
chr1_1746768	1746768	11.38191049	lmxll	SNP	G
chr1_1749867	1749867	11.42309568	lmxll	SNP	C
chr1_1764171	1764171	11.45003772	lmxll	SNP	A
chr1_1764767	1764767	11.45003772	nnxnp	SNP	G
chr1_1784121	1784121	11.45003772	lmxll	SNP	G
chr1_1787482	1787482	11.48949874	lmxll	SNP	G
chr1_1801926	1801926	11.50587087	lmxll	SNP	C
chr1_1817832	1817832	11.5683758	lmxll	SNP	A
chr1_1817936	1817936	11.5683758	nnxnp	SNP	C
chr1_1820067	1820067	11.5683758	nnxnp	SNP	C
chr1_1852131	1852131	11.58623222	nnxnp	SNP	T
chr1_1852132	1852132	11.63166037	nnxnp	SNP	A
chr1_1852160	1852160	11.6405361	nnxnp	SNP	A
chr1_1854730	1854730	11.6405361	hkxhk	SNP	C
chr1_1855923	1855923	11.65339991	nnxnp	SNP	A
chr1_1856086	1856086	11.66723825	nnxnp	SNP	T
chr1_1856444	1856444	11.67611398	nnxnp	INDEL	A
chr1_1856537	1856537	11.67611398	nnxnp	SNP	A
chr1_1856575	1856575	11.67611398	nnxnp	SNP	A
chr1_1857453	1857453	11.72506544	hkxhk	SNP	A
chr1_1861815	1861815	11.73671484	nnxnp	SNP	G
chr1_1861989	1861989	11.76658047	nnxnp	SNP	T
chr1_1862009	1862009	11.76658047	nnxnp	SNP	A
chr1_1862010	1862010	11.78873981	nnxnp	SNP	C
chr1_1864373	1864373	11.80484207	lmxll	SNP	A
chr1_1867254	1867254	11.85388348	nnxnp	SNP	A
chr1_1879458	1879458	11.85880111	nnxnp	SNP	A
chr1_1887402	1887402	11.89821716	lmxll	SNP	G
chr1_1892489	1892489	11.89821716	nnxnp	SNP	A
chr1_1911593	1911593	11.89821716	nnxnp	SNP	G
chr1_1911630	1911630	11.91022638	nnxnp	SNP	C
chr1_1931476	1931476	11.96824847	hkxhk	SNP	T
chr1_1938518	1938518	11.99806913	nnxnp	INDEL	A
chr1_1938527	1938527	11.99806913	nnxnp	SNP	G
chr1_1947189	1947189	12.04349728	nnxnp	SNP	C
chr1_1947246	1947246	12.05237301	lmxll	SNP	A
chr1_1947249	1947249	12.06124874	nnxnp	SNP	G
chr1_1947429	1947429	12.06124874	nnxnp	SNP	T
chr1_1953022	1953022	12.07613658	nnxnp	SNP	G
chr1_1953104	1953104	12.10609217	nnxnp	SNP	A
chr1_1959364	1959364	12.10627209	nnxnp	SNP	A
chr1_1959399	1959399	12.14231475	nnxnp	SNP	T
chr1_1959407	1959407	12.15119048	lmxll	SNP	T
chr1_1959441	1959441	12.15119048	nnxnp	SNP	G
chr1_1959458	1959458	12.2060341	nnxnp	SNP	C,G
chr1_1961080	1961080	12.2060341	nnxnp	SNP	T
chr1_1961541	1961541	12.4178972	lmxll	SNP	C
chr1_1963925	1963925	12.43584357	lmxll	SNP	C
chr1_1963936	1963936	12.43584357	lmxll	SNP	C
chr1_1964100	1964100	12.46278561	lmxll	SNP	A
chr1_1964157	1964157	12.46278561	lmxll	SNP	T
chr1_1964166	1964166	12.48122674	nnxnp	INDEL	AAT
chr1_1967736	1967736	12.69072097	lmxll	SNP	G
chr1_1968015	1968015	12.70171069	nnxnp	SNP	A
chr1_1968018	1968018	12.79381139	lmxll	SNP	C
chr1_1968072	1968072	12.81232748	lmxll	SNP	G
chr1_1968171	1968171	12.82136814	lmxll	SNP	G
chr1_1968407	1968407	12.83331739	nnxnp	SNP	G
chr1_1973831	1973831	12.83757534	lmxll	SNP	T
chr1_1999168	1999168	12.9158227	nnxnp	SNP	A
chr1_2010126	2010126	12.93898656	lmxll	SNP	A
chr1_2010272	2010272	12.94153534	nnxnp	SNP	T
chr1_2010279	2010279	12.95233015	nnxnp	SNP	T
chr1_2010284	2010284	12.95233015	nnxnp	SNP	G
chr1_2011476	2011476	12.95233015	lmxll	SNP	T
chr1_2011715	2011715	13.00619924	lmxll	SNP	A
chr1_2016949	2016949	13.00673898	lmxll	SNP	G
chr1_2019189	2019189	13.15903572	lmxll	SNP	T
chr1_2024883	2024883	13.19869165	nnxnp	SNP	G
chr1_2025124	2025124	13.19869165	lmxll	SNP	C
chr1_2029159	2029159	13.22563369	lmxll	INDEL	GGACAT
chr1_2030688	2030688	13.22563369	lmxll	SNP	A
chr1_2032984	2032984	13.23450942	nnxnp	SNP	G
chr1_2033016	2033016	13.25807809	nnxnp	SNP	T
chr1_2033036	2033036	13.27025223	nnxnp	SNP	A
chr1_2056398	2056398	13.27025223	lmxll	SNP	A
chr1_2060564	2060564	13.27025223	lmxll	SNP	G
chr1_2062126	2062126	13.27912796	lmxll	SNP	A
chr1_2062174	2062174	13.27912796	lmxll	SNP	G
chr1_2076089	2076089	13.27912796	lmxll	SNP	A
chr1_2076201	2076201	13.30607	lmxll	SNP	A
chr1_2076220	2076220	13.30607	lmxll	SNP	T
chr1_2083491	2083491	13.39975994	nnxnp	SNP	A
chr1_2083566	2083566	13.41761635	lmxll	SNP	C
chr1_2094547	2094547	13.41761635	nnxnp	SNP	G
chr1_2094560	2094560	13.41761635	nnxnp	SNP	C
chr1_2094564	2094564	13.45503835	nnxnp	INDEL	TCTAA
chr1_2094566	2094566	13.48070601	nnxnp	SNP	A
chr1_2094569	2094569	13.48070601	nnxnp	INDEL	T
chr1_2094599	2094599	13.51683863	nnxnp	SNP	T
chr1_2094615	2094615	13.51683863	nnxnp	SNP	C
chr1_2095098	2095098	13.56226678	nnxnp	SNP	T
chr1_2095567	2095567	13.56226678	lmxll	SNP	A
chr1_2095586	2095586	13.5983994	nnxnp	SNP	G
chr1_2095754	2095754	13.5983994	nnxnp	SNP	C,G
chr1_2095957	2095957	13.61715538	nnxnp	SNP	T
chr1_2096316	2096316	13.63411222	hkxhk	SNP	T
chr1_2100007	2100007	13.63411222	nnxnp	SNP	T
chr1_2100221	2100221	13.66105426	nnxnp	SNP	C
chr1_2100421	2100421	13.68334854	efxeg	INDEL	TTTAA,TTTAAGA
chr1_2101215	2101215	13.70582273	nnxnp	SNP	T
chr1_2101453	2101453	13.70582273	nnxnp	SNP	T
chr1_2105892	2105892	13.74194036	hkxhk	SNP	G
chr1_2105905	2105905	13.75979677	nnxnp	SNP	T
chr1_2120185	2120185	13.75979677	lmxll	SNP	C
chr1_2122024	2122024	13.77024674	nnxnp	SNP	A
chr1_2122279	2122279	13.9364568	hkxhk	SNP	G
chr1_2122349	2122349	13.93926045	hkxhk	SNP	A
chr1_2122488	2122488	13.99720758	lmxll	SNP	G
chr1_2122497	2122497	14.09193202	lmxll	SNP	C
chr1_2122541	2122541	14.0942559	lmxll	SNP	T
chr1_2126085	2126085	14.0963399	hkxhk	SNP	T
chr1_2128037	2128037	14.09771923	lmxll	SNP	A
chr1_2128065	2128065	14.09927848	lmxll	SNP	G
chr1_2128093	2128093	14.09995316	lmxll	SNP	A
chr1_2128094	2128094	14.10085273	lmxll	SNP	A
chr1_2128192	2128192	14.15301264	lmxll	SNP	A
chr1_2128210	2128210	14.15499169	nnxnp	SNP	A
chr1_2128242	2128242	14.24033064	nnxnp	SNP	A
chr1_2128250	2128250	14.26757254	lmxll	SNP	T
chr1_2128258	2128258	14.26757254	lmxll	SNP	C
chr1_2128275	2128275	14.28332996	lmxll	SNP	C
chr1_2128276	2128276	14.28491919	lmxll	SNP	T
chr1_2128282	2128282	14.43941988	lmxll	INDEL	T
chr1_2131563	2131563	14.43941988	hkxhk	SNP	T
chr1_2131612	2131612	14.43941988	hkxhk	SNP	A
chr1_2131642	2131642	14.47685687	hkxhk	SNP	A
chr1_2131645	2131645	14.47879094	hkxhk	SNP	C
chr1_2134973	2134973	14.49057528	hkxhk	SNP	G
chr1_2135199	2135199	14.50625773	lmxll	SNP	G
chr1_2135200	2135200	14.52038094	lmxll	SNP	T
chr1_2143150	2143150	14.52041092	hkxhk	INDEL	TTGGCCAGAAACCTCAAATTGTCAAGAGATGGTGACTTCCGATGTTAGACACAC
chr1_2148087	2148087	14.54078612	nnxnp	SNP	C
chr1_2148109	2148109	14.56156613	nnxnp	SNP	A
chr1_2148138	2148138	14.59736891	nnxnp	SNP	T
chr1_2184431	2184431	14.63219716	lmxll	SNP	T
chr1_2199067	2199067	14.63219716	lmxll	SNP	T
chr1_2237450	2237450	14.63219716	lmxll	SNP	T
chr1_2238378	2238378	14.6558108	nnxnp	INDEL	T
chr1_2238383	2238383	14.6558108	nnxnp	SNP	G
chr1_2238603	2238603	14.66359206	nnxnp	SNP	C
chr1_2238651	2238651	14.71165894	nnxnp	INDEL	C
chr1_2241731	2241731	14.71165894	nnxnp	SNP	C
chr1_2241740	2241740	14.71165894	nnxnp	SNP	C
chr1_2241758	2241758	14.72729642	nnxnp	SNP	C
chr1_2241931	2241931	14.72729642	nnxnp	SNP	T
chr1_2241971	2241971	14.73507767	nnxnp	SNP	A
chr1_2260115	2260115	14.73507767	lmxll	SNP	C
chr1_2260201	2260201	14.76209468	lmxll	SNP	T
chr1_2262010	2262010	14.77438877	nnxnp	SNP	G
chr1_2262035	2262035	14.77438877	nnxnp	SNP	T
chr1_2262072	2262072	14.78217002	nnxnp	SNP	A
chr1_2270812	2270812	14.78217002	lmxll	SNP	C
chr1_2270875	2270875	14.79888698	lmxll	SNP	T
chr1_2274777	2274777	14.8165185	lmxll	SNP	C
chr1_2274795	2274795	14.81869246	lmxll	SNP	A
chr1_2277377	2277377	14.85428534	lmxll	SNP	C
chr1_2278863	2278863	14.85428534	lmxll	SNP	G
chr1_2290047	2290047	14.86398567	nnxnp	SNP	T
chr1_2293464	2293464	14.89367139	lmxll	SNP	T
chr1_2295716	2295716	14.89367139	lmxll	SNP	T
chr1_2301533	2301533	14.92849964	nnxnp	SNP	A
chr1_2304065	2304065	14.95115374	nnxnp	SNP	T
chr1_2304244	2304244	14.97064437	nnxnp	SNP	A
chr1_2304361	2304361	14.97118411	lmxll	SNP	T
chr1_2311404	2311404	14.98383802	lmxll	SNP	T
chr1_2311508	2311508	14.9969867	lmxll	SNP	G
chr1_2321114	2321114	14.99722658	nnxnp	SNP	G
chr1_2344441	2344441	15.17255226	nnxnp	SNP	T
chr1_2365615	2365615	15.19145816	nnxnp	SNP	A
chr1_2370250	2370250	15.37312578	lmxll	INDEL	TCCC
chr1_2384250	2384250	15.37312578	lmxll	SNP	A
chr1_2384259	2384259	15.37312578	lmxll	SNP	G
chr1_2384263	2384263	15.45522629	lmxll	SNP	G
chr1_2384267	2384267	15.46867483	lmxll	SNP	T
chr1_2384305	2384305	15.476636	lmxll	SNP	T
chr1_2384323	2384323	15.48842033	lmxll	SNP	T
chr1_2384324	2384324	15.55231959	lmxll	SNP	A
chr1_2395521	2395521	15.55231959	hkxhk	SNP	G
chr1_2399450	2399450	15.55231959	lmxll	SNP	C
chr1_2422789	2422789	15.65843855	lmxll	INDEL	A
chr1_2422796	2422796	15.66068747	lmxll	SNP	A
chr1_2422848	2422848	15.71694041	lmxll	SNP	A
chr1_2422849	2422849	15.742758	lmxll	SNP	G
chr1_2422863	2422863	15.742758	lmxll	SNP	C
chr1_2422879	2422879	15.78260883	lmxll	INDEL	AAGCT
chr1_2437325	2437325	15.78260883	nnxnp	SNP	C
chr1_2437606	2437606	15.80625246	nnxnp	SNP	A
chr1_2438813	2438813	15.80625246	lmxll	SNP	T
chr1_2438832	2438832	15.81403371	lmxll	INDEL	GA
chr1_2453064	2453064	15.82215981	nnxnp	SNP	C
chr1_2455853	2455853	15.98570114	nnxnp	INDEL	GA
chr1_2467400	2467400	16.00937476	lmxll	SNP	A
chr1_2471460	2471460	16.01066414	nnxnp	SNP	C
chr1_2477062	2477062	16.03180397	nnxnp	SNP	G
chr1_2478391	2478391	16.03774111	lmxll	SNP	A
chr1_2478399	2478399	16.04364827	nnxnp	SNP	C
chr1_2480070	2480070	16.04705164	lmxll	SNP	A
chr1_2480074	2480074	16.08273447	lmxll	SNP	A
chr1_2480125	2480125	16.08273447	nnxnp	SNP	G
chr1_2481726	2481726	16.10634812	hkxhk	SNP	T
chr1_2490460	2490460	16.12996176	nnxnp	SNP	A
chr1_2490578	2490578	16.12996176	nnxnp	SNP	C
chr1_2493467	2493467	16.16162653	lmxll	SNP	G
chr1_2495230	2495230	16.16162653	lmxll	SNP	T
chr1_2497898	2497898	16.23513617	lmxll	SNP	A
chr1_2498013	2498013	16.27347273	nnxnp	SNP	C
chr1_2501200	2501200	16.27866024	lmxll	SNP	A
chr1_2502627	2502627	16.28192866	lmxll	SNP	G
chr1_2504499	2504499	16.30237883	lmxll	SNP	G
chr1_2505194	2505194	16.31545254	nnxnp	SNP	A
chr1_2505418	2505418	16.33213951	nnxnp	SNP	A
chr1_2505422	2505422	16.33264927	lmxll	SNP	C
chr1_2505444	2505444	16.34252952	nnxnp	SNP	G
chr1_2505459	2505459	16.35470366	nnxnp	SNP	G
chr1_2507891	2507891	16.35719246	nnxnp	SNP	G
chr1_2508235	2508235	16.35833192	lmxll	SNP	C
chr1_2512146	2512146	16.36324955	lmxll	SNP	T
chr1_2512207	2512207	16.36393922	nnxnp	SNP	C
chr1_2512224	2512224	16.36765743	nnxnp	SNP	A
chr1_2512241	2512241	16.43773372	nnxnp	SNP	G
chr1_2527591	2527591	16.47050796	lmxll	SNP	A
chr1_2527600	2527600	16.47050796	nnxnp	SNP	G
chr1_2527624	2527624	16.48562069	nnxnp	SNP	G
chr1_2527633	2527633	16.53203837	nnxnp	SNP	A
chr1_2527663	2527663	16.53203837	nnxnp	SNP	T
chr1_2527731	2527731	16.5436128	hkxhk	SNP	C
chr1_2527775	2527775	16.55464749	nnxnp	SNP	G
chr1_2529207	2529207	16.55464749	nnxnp	SNP	A
chr1_2529261	2529261	16.57884585	nnxnp	SNP	G
chr1_2530967	2530967	16.6816514	lmxll	SNP	G
chr1_2537065	2537065	16.6897775	lmxll	SNP	A
chr1_2539724	2539724	16.6897775	lmxll	SNP	C
chr1_2539727	2539727	16.71258153	lmxll	SNP	T
chr1_2543595	2543595	16.72009291	lmxll	SNP	C
chr1_2544003	2544003	16.72009291	lmxll	SNP	A
chr1_2550485	2550485	16.73520565	nnxnp	SNP	G
chr1_2552244	2552244	16.74495096	nnxnp	SNP	C
chr1_2562867	2562867	16.77081352	lmxll	SNP	T
chr1_2565052	2565052	16.78067877	nnxnp	SNP	C
chr1_2565053	2565053	16.7957915	nnxnp	INDEL	GTT,GT
chr1_2565320	2565320	16.7957915	nnxnp	SNP	C
chr1_2565440	2565440	16.82640678	nnxnp	SNP	C
chr1_2565483	2565483	16.84366348	lmxll	SNP	G
chr1_2565491	2565491	16.98691958	lmxll	SNP	C
chr1_2565645	2565645	16.98864375	lmxll	SNP	G
chr1_2565648	2565648	17.14299451	hkxhk	INDEL	G
chr1_2575910	2575910	17.15073078	lmxll	SNP	A
chr1_2578450	2578450	17.16062603	nnxnp	SNP	A
chr1_2578989	2578989	17.16957672	nnxnp	SNP	C
chr1_2593611	2593611	17.19098642	lmxll	SNP	A
chr1_2598246	2598246	17.20893279	lmxll	SNP	C
chr1_2598274	2598274	17.23154192	lmxll	SNP	T
chr1_2598977	2598977	17.23364091	lmxll	SNP	A
chr1_2598998	2598998	17.24365609	lmxll	SNP	C,T
chr1_2599193	2599193	17.24365609	nnxnp	SNP	A
chr1_2601114	2601114	17.30631095	nnxnp	SNP	T
chr1_2619854	2619854	17.30631095	nnxnp	SNP	A
chr1_2632495	2632495	17.34476746	lmxll	SNP	G
chr1_2632611	2632611	17.34476746	hkxhk	SNP	C
chr1_2636791	2636791	17.37535275	nnxnp	SNP	T
chr1_2652294	2652294	17.37535275	lmxll	SNP	T
chr1_2652397	2652397	17.39815678	lmxll	SNP	T
chr1_2652474	2652474	17.42096081	lmxll	SNP	T
chr1_2661986	2661986	17.42096081	lmxll	SNP	G
chr1_2662013	2662013	17.43006143	lmxll	SNP	T
chr1_2662237	2662237	17.45899751	lmxll	SNP	T
chr1_2662307	2662307	17.45899751	lmxll	SNP	T
chr1_2662327	2662327	17.49201163	lmxll	SNP	T
chr1_2673233	2673233	17.59321296	nnxnp	SNP	T
chr1_2675313	2675313	17.60181882	nnxnp	SNP	T
chr1_2675322	2675322	17.60181882	nnxnp	SNP	G
chr1_2675361	2675361	17.60181882	lmxll	SNP	A
chr1_2675382	2675382	17.62811617	lmxll	SNP	A
chr1_2678124	2678124	17.64975076	lmxll	SNP	A
chr1_2678163	2678163	17.65204466	lmxll	SNP	T
chr1_2678250	2678250	17.73642408	lmxll	SNP	C
chr1_2678252	2678252	17.78288673	nnxnp	SNP	T
chr1_2678300	2678300	17.78288673	nnxnp	SNP	C
chr1_2678304	2678304	17.81660551	nnxnp	SNP	A
chr1_2684751	2684751	17.96004152	lmxll	SNP	T
chr1_2686069	2686069	18.03693953	nnxnp	SNP	T
chr1_2686112	2686112	18.03693953	lmxll	SNP	A
chr1_2690723	2690723	18.0756809	lmxll	SNP	G
chr1_2690751	2690751	18.07855951	lmxll	SNP	G
chr1_2696075	2696075	18.09292261	lmxll	SNP	A
chr1_2718114	2718114	18.09436191	nnxnp	SNP	C
chr1_2738341	2738341	18.16271404	lmxll	SNP	C
chr1_2743132	2743132	18.16364359	nnxnp	SNP	T
chr1_2743141	2743141	18.17508309	nnxnp	SNP	G
chr1_2743162	2743162	18.17724205	nnxnp	INDEL	A
chr1_2745333	2745333	18.22730297	lmxll	SNP	T
chr1_2755905	2755905	18.3048007	nnxnp	SNP	T
chr1_2780548	2780548	18.30799416	nnxnp	SNP	T
chr1_2780620	2780620	18.32502597	nnxnp	SNP	C
chr1_2787133	2787133	18.32764971	hkxhk	SNP	C
chr1_2794616	2794616	18.38103903	lmxll	SNP	A
chr1_2794627	2794627	18.40267362	lmxll	INDEL	GGA
chr1_2803037	2803037	18.44039548	lmxll	SNP	A
chr1_2809589	2809589	18.44039548	lmxll	SNP	T
chr1_2809796	2809796	18.44039548	nnxnp	SNP	G
chr1_2809800	2809800	18.44891138	nnxnp	SNP	T
chr1_2822823	2822823	18.45742729	hkxhk	INDEL	TA
chr1_2830590	2830590	18.47454905	lmxll	SNP	G
chr1_2833160	2833160	18.47454905	lmxll	SNP	T
chr1_2835740	2835740	18.47454905	lmxll	SNP	G
chr1_2842366	2842366	18.48306495	nnxnp	SNP	A
chr1_2855217	2855217	18.48306495	lmxll	SNP	A
chr1_2861629	2861629	18.52664899	nnxnp	SNP	T
chr1_2875568	2875568	18.52664899	nnxnp	SNP	T
chr1_2887561	2887561	18.57161236	lmxll	SNP	G
chr1_2887902	2887902	18.572377	nnxnp	SNP	G
chr1_2887954	2887954	18.57837411	nnxnp	SNP	T
chr1_2906161	2906161	18.58227224	lmxll	INDEL	C
chr1_2906416	2906416	18.74887211	lmxll	SNP	G
chr1_2941483	2941483	18.77567921	lmxll	SNP	C
chr1_2942756	2942756	18.78822818	lmxll	SNP	G
chr1_2942797	2942797	18.82816896	lmxll	SNP	C
chr1_2946983	2946983	18.83783931	lmxll	SNP	G
chr1_2947027	2947027	18.91694127	lmxll	SNP	T
chr1_2947041	2947041	18.91694127	lmxll	SNP	A
chr1_2947219	2947219	18.91694127	lmxll	SNP	C
chr1_2947423	2947423	18.92803593	lmxll	SNP	C
chr1_2947429	2947429	18.95124477	lmxll	SNP	C
chr1_2950685	2950685	18.95124477	lmxll	SNP	C
chr1_2950686	2950686	18.96928109	lmxll	SNP	A
chr1_2968230	2968230	19.12547597	lmxll	INDEL	C
chr1_2968278	2968278	19.13630076	lmxll	SNP	A
chr1_2968284	2968284	19.13630076	lmxll	SNP	A
chr1_2971390	2971390	19.14799513	lmxll	SNP	A
chr1_2972569	2972569	19.16998955	lmxll	SNP	T
chr1_2975246	2975246	19.19451776	lmxll	SNP	T
chr1_2975302	2975302	19.22607758	lmxll	SNP	C
chr1_2982912	2982912	19.23116013	nnxnp	SNP	C
chr1_2982952	2982952	19.23120511	nnxnp	SNP	T
chr1_2985046	2985046	19.31450505	nnxnp	SNP	T
chr1_2985092	2985092	19.46879583	lmxll	SNP	A
chr1_2985531	2985531	19.46905071	lmxll	INDEL	ACC
chr1_2985535	2985535	19.46918565	lmxll	INDEL	G
chr1_2985635	2985635	19.53732787	lmxll	SNP	A
chr1_2994008	2994008	19.53732787	nnxnp	SNP	T
chr1_2994052	2994052	19.53732787	lmxll	SNP	A
chr1_2994347	2994347	19.53732787	lmxll	SNP	A
chr1_2994370	2994370	19.53732787	lmxll	SNP	C
chr1_3010616	3010616	19.55605386	nnxnp	SNP	C
chr1_3010657	3010657	19.59801868	lmxll	SNP	A
chr1_3012723	3012723	19.72094455	lmxll	SNP	A
chr1_3012777	3012777	19.72179914	nnxnp	SNP	C
chr1_3015989	3015989	19.7231335	lmxll	SNP	C
chr1_3021432	3021432	19.73508275	lmxll	SNP	G
chr1_3029336	3029336	19.73905584	lmxll	SNP	G
chr1_3031172	3031172	19.73905584	lmxll	SNP	T
chr1_3046846	3046846	19.81096126	lmxll	SNP	G
chr1_3050685	3050685	19.81096126	lmxll	SNP	A
chr1_3051438	3051438	19.81096126	lmxll	SNP	C
chr1_3061830	3061830	19.86421564	hkxhk	SNP	A
chr1_3062711	3062711	19.96295815	nnxnp	SNP	A
chr1_3065992	3065992	19.97442763	nnxnp	SNP	G
chr1_3066017	3066017	19.97642167	nnxnp	SNP	A
chr1_3068725	3068725	20.00868616	lmxll	SNP	T
chr1_3087947	3087947	20.01720206	nnxnp	SNP	T
chr1_3087949	3087949	20.06985673	lmxll	SNP	A
chr1_3102752	3102752	20.06990171	lmxll	SNP	T
chr1_3105429	3105429	20.11356071	hkxhk	INDEL	A
chr1_3113592	3113592	20.11356071	nnxnp	SNP	T
chr1_3113630	3113630	20.15714475	nnxnp	SNP	G
chr1_3117522	3117522	20.16566065	lmxll	SNP	G
chr1_3127727	3127727	20.17416156	nnxnp	SNP	C
chr1_3128487	3128487	20.27363872	hkxhk	SNP	G
chr1_3130287	3130287	20.27363872	hkxhk	SNP	G
chr1_3133598	3133598	20.29077548	lmxll	SNP	G
chr1_3142598	3142598	20.31660805	lmxll	SNP	C
chr1_3168390	3168390	20.31660805	lmxll	SNP	G
chr1_3176909	3176909	20.32512395	nnxnp	SNP	G
chr1_3184624	3184624	20.33363986	lmxll	SNP	A
chr1_3191370	3191370	20.33363986	nnxnp	SNP	A
chr1_3191409	3191409	20.34717835	nnxnp	SNP	C
chr1_3205135	3205135	20.40100246	lmxll	SNP	C
chr1_3205821	3205821	20.42260707	nnxnp	SNP	T
chr1_3205846	3205846	20.51982031	nnxnp	SNP	A
chr1_3211983	3211983	20.51982031	hkxhk	INDEL	C
chr1_3211990	3211990	20.54081021	hkxhk	INDEL	A,*
chr1_3216090	3216090	20.60767805	lmxll	INDEL	T
chr1_3218620	3218620	20.66027275	nnxnp	SNP	G
chr1_3219239	3219239	20.66027275	lmxll	SNP	T
chr1_3220867	3220867	20.66027275	lmxll	SNP	C
chr1_3220890	3220890	20.66027275	lmxll	SNP	T
chr1_3221129	3221129	20.66878866	lmxll	SNP	T
chr1_3241935	3241935	20.67730456	lmxll	SNP	G
chr1_3241937	3241937	20.67730456	lmxll	INDEL	GCT
chr1_3246072	3246072	20.711743	lmxll	SNP	A
chr1_3256900	3256900	20.74661622	lmxll	SNP	G
chr1_3263334	3263334	20.74661622	lmxll	SNP	G,C
chr1_3265842	3265842	20.75513213	hkxhk	SNP	T
chr1_3265852	3265852	20.75513213	lmxll	SNP	C
chr1_3265873	3265873	20.75513213	lmxll	SNP	C
chr1_3265903	3265903	20.76364803	lmxll	SNP	T
chr1_3266147	3266147	21.03663673	hkxhk	SNP	A
chr1_3266224	3266224	21.03663673	nnxnp	SNP	G
chr1_3273254	3273254	21.20403121	nnxnp	SNP	C
chr1_3273255	3273255	21.30632701	nnxnp	SNP	C
chr1_3273267	3273267	21.30632701	nnxnp	SNP	G
chr1_3273289	3273289	21.34097535	nnxnp	SNP	T
chr1_3276823	3276823	21.42135169	hkxhk	SNP	T
chr1_3281788	3281788	21.42135169	lmxll	SNP	C
chr1_3284351	3284351	21.4308871	lmxll	SNP	A
chr1_3310692	3310692	21.48859434	nnxnp	SNP	A
chr1_3317195	3317195	21.51724556	lmxll	SNP	C
chr1_3318226	3318226	21.51733552	nnxnp	SNP	T
chr1_3330126	3330126	21.57706679	nnxnp	SNP	T
chr1_3330294	3330294	21.5961826	nnxnp	SNP	A
chr1_3332626	3332626	21.5961826	nnxnp	SNP	C
chr1_3332689	3332689	21.6142639	nnxnp	SNP	G
chr1_3355160	3355160	21.62535856	hkxhk	SNP	T
chr1_3371200	3371200	21.62747255	nnxnp	SNP	C
chr1_3371201	3371201	21.67263083	nnxnp	SNP	A
chr1_3371222	3371222	21.70176181	nnxnp	SNP	G
chr1_3374886	3374886	21.71048762	nnxnp	SNP	C
chr1_3377253	3377253	21.7107425	lmxll	SNP	T
chr1_3382069	3382069	21.71129723	lmxll	SNP	G
chr1_3396372	3396372	21.85215448	lmxll	SNP	G
chr1_3396429	3396429	21.8699809	hkxhk	SNP	T
chr1_3399882	3399882	21.92334024	nnxnp	SNP	G
chr1_3399902	3399902	21.92334024	nnxnp	SNP	G
chr1_3399926	3399926	21.92334024	nnxnp	SNP	C
chr1_3402779	3402779	21.93542443	lmxll	SNP	A
chr1_3402787	3402787	21.98023787	lmxll	SNP	G
chr1_3422164	3422164	21.99293676	lmxll	SNP	C
chr1_3440710	3440710	21.99293676	lmxll	SNP	G
chr1_3443312	3443312	21.99923374	lmxll	SNP	A
chr1_3444710	3444710	22.04557645	lmxll	SNP	A
chr1_3444772	3444772	22.04557645	lmxll	SNP	G
chr1_3445067	3445067	22.04557645	nnxnp	SNP	A
chr1_3445094	3445094	22.0685454	nnxnp	SNP	A
chr1_3445175	3445175	22.07989494	nnxnp	SNP	G
chr1_3447822	3447822	22.10674702	hkxhk	SNP	A
chr1_3449246	3449246	22.14974634	lmxll	SNP	T
chr1_3449824	3449824	22.14974634	nnxnp	SNP	C
chr1_3451241	3451241	22.37020031	lmxll	SNP	C
chr1_3454007	3454007	22.41334955	lmxll	SNP	T
chr1_3454161	3454161	22.43631851	nnxnp	SNP	C
chr1_3457596	3457596	22.43631851	nnxnp	SNP	G
chr1_3457793	3457793	22.43631851	nnxnp	SNP	A
chr1_3463051	3463051	22.44417473	nnxnp	SNP	C
chr1_3463113	3463113	22.45389005	nnxnp	SNP	A
chr1_3463130	3463130	22.47351561	nnxnp	SNP	C
chr1_3478904	3478904	22.48200153	nnxnp	SNP	T
chr1_3479015	3479015	22.50315636	lmxll	SNP	C
chr1_3481369	3481369	22.5138762	lmxll	INDEL	C
chr1_3486385	3486385	22.52227216	nnxnp	SNP	G
chr1_3487786	3487786	22.52227216	nnxnp	SNP	A
chr1_3487861	3487861	22.52227216	nnxnp	SNP	C
chr1_3487897	3487897	22.52227216	nnxnp	SNP	T
chr1_3493530	3493530	22.55452165	lmxll	SNP	C
chr1_3493629	3493629	22.5741772	lmxll	SNP	T
chr1_3495761	3495761	22.59057931	hkxhk	SNP	G
chr1_3496575	3496575	22.6342533	hkxhk	INDEL	T
chr1_3503038	3503038	22.63531779	lmxll	SNP	A
chr1_3512810	3512810	22.63621736	nnxnp	SNP	G
chr1_3513083	3513083	22.6633693	nnxnp	SNP	C
chr1_3517939	3517939	22.6904013	nnxnp	SNP	T
chr1_3518107	3518107	22.72560436	lmxll	SNP	A
chr1_3518359	3518359	22.72951748	lmxll	SNP	A
chr1_3518369	3518369	22.73257601	lmxll	SNP	G
chr1_3527672	3527672	22.73257601	nnxnp	SNP	C
chr1_3527721	3527721	22.75554496	lmxll	SNP	C
chr1_3527724	3527724	22.75560493	nnxnp	SNP	C
chr1_3531793	3531793	22.98772329	nnxnp	SNP	C
chr1_3532054	3532054	22.98772329	lmxll	SNP	T
chr1_3547460	3547460	23.01069224	lmxll	SNP	T
chr1_3548646	3548646	23.01069224	nnxnp	SNP	A
chr1_3550084	3550084	23.10976459	nnxnp	SNP	C
chr1_3550107	3550107	23.10976459	nnxnp	SNP	A
chr1_3550140	3550140	23.10976459	nnxnp	SNP	A
chr1_3550332	3550332	23.11550683	nnxnp	SNP	C
chr1_3550340	3550340	23.39075943	nnxnp	SNP	C
chr1_3557418	3557418	23.45518345	nnxnp	SNP	G
chr1_3559327	3559327	23.55824388	lmxll	SNP	G
chr1_3563008	3563008	23.55857372	nnxnp	INDEL	G
chr1_3563026	3563026	23.56695469	nnxnp	SNP	C
chr1_3563052	3563052	23.57866406	nnxnp	SNP	A
chr1_3563251	3563251	23.58250221	nnxnp	SNP	G
chr1_3563262	3563262	23.58692508	nnxnp	SNP	T
chr1_3563380	3563380	23.58762974	nnxnp	SNP	G
chr1_3563385	3563385	23.62242801	nnxnp	INDEL	CACA
chr1_3564334	3564334	23.62242801	nnxnp	SNP	T
chr1_3564367	3564367	23.63377755	nnxnp	SNP	T
chr1_3564393	3564393	23.63377755	nnxnp	SNP	T,*
chr1_3564396	3564396	23.65089931	nnxnp	SNP	A,*
chr1_3567770	3567770	23.65089931	nnxnp	SNP	A
chr1_3568706	3568706	23.65089931	nnxnp	SNP	G
chr1_3568805	3568805	23.66224885	nnxnp	SNP	T
chr1_3568954	3568954	23.66224885	nnxnp	SNP	A
chr1_3569125	3569125	23.66224885	nnxnp	SNP	T
chr1_3572167	3572167	23.68787153	nnxnp	SNP	G
chr1_3584054	3584054	23.70066038	nnxnp	SNP	C
chr1_3584068	3584068	23.70127508	nnxnp	SNP	G
chr1_3584131	3584131	23.70179983	nnxnp	SNP	C
chr1_3584240	3584240	23.71676263	nnxnp	SNP	A
chr1_3586868	3586868	23.74361472	nnxnp	SNP	A
chr1_3600191	3600191	23.74361472	nnxnp	SNP	C
chr1_3600225	3600225	23.74361472	nnxnp	SNP	T
chr1_3605449	3605449	23.81964315	nnxnp	SNP	C
chr1_3605518	3605518	23.82220692	nnxnp	SNP	A
chr1_3605538	3605538	23.83662998	nnxnp	SNP	T
chr1_3607666	3607666	23.83662998	hkxhk	SNP	G
chr1_3636617	3636617	23.91555202	nnxnp	INDEL	G
chr1_3639605	3639605	23.91555202	nnxnp	SNP	T
chr1_3653180	3653180	23.94543265	nnxnp	SNP	A
chr1_3653193	3653193	23.96059036	nnxnp	SNP	C
chr1_3653215	3653215	23.96126503	nnxnp	SNP	T
chr1_3655089	3655089	23.96187974	nnxnp	SNP	A
chr1_3658586	3658586	23.96970597	nnxnp	SNP	G
chr1_3658598	3658598	23.9708904	nnxnp	SNP	G
chr1_3662946	3662946	23.98652788	nnxnp	SNP	T
chr1_3681800	3681800	23.98652788	lmxll	SNP	A
chr1_3697403	3697403	23.98652788	lmxll	INDEL	A
chr1_3697530	3697530	24.00140073	nnxnp	INDEL	A
chr1_3697539	3697539	24.00925695	lmxll	SNP	C
chr1_3703442	3703442	24.03558428	hkxhk	SNP	A
chr1_3705490	3705490	24.05520985	nnxnp	SNP	C
chr1_3714974	3714974	24.07811883	hkxhk	SNP	G
chr1_3714999	3714999	24.07820878	lmxll	INDEL	A
chr1_3715002	3715002	24.24342931	lmxll	SNP	A
chr1_3715009	3715009	24.24356425	nnxnp	SNP	G
chr1_3721560	3721560	24.3773599	nnxnp	SNP	A
chr1_3727110	3727110	24.39686551	nnxnp	SNP	A
chr1_3730729	3730729	24.58598455	lmxll	SNP	G
chr1_3731652	3731652	24.61028786	nnxnp	SNP	C
chr1_3737963	3737963	24.61733447	lmxll	SNP	A
chr1_3741601	3741601	24.63117282	lmxll	SNP	C
chr1_3749067	3749067	24.64628555	nnxnp	SNP	C
chr1_3749273	3749273	24.66833994	nnxnp	INDEL	CA
chr1_3754308	3754308	24.69148881	lmxll	SNP	T
chr1_3754507	3754507	24.69148881	nnxnp	INDEL	A
chr1_3755790	3755790	24.74547784	nnxnp	SNP	G
chr1_3758446	3758446	24.78649811	nnxnp	SNP	C
chr1_3758505	3758505	24.78649811	nnxnp	SNP	T
chr1_3758524	3758524	24.78649811	hkxhk	SNP	T
chr1_3763284	3763284	24.80996182	nnxnp	SNP	G
chr1_3765275	3765275	24.83592933	lmxll	SNP	G
chr1_3765319	3765319	24.95405751	nnxnp	SNP	A
chr1_3775139	3775139	24.99381839	nnxnp	SNP	C
chr1_3782873	3782873	25.05927691	lmxll	SNP	T
chr1_3786134	3786134	25.08636888	hkxhk	SNP	A
chr1_3791646	3791646	25.08636888	nnxnp	SNP	T
chr1_3796524	3796524	25.08636888	nnxnp	SNP	C
chr1_3796553	3796553	25.08636888	nnxnp	SNP	A
chr1_3796574	3796574	25.14164729	nnxnp	SNP	C
chr1_3797316	3797316	25.1725924	nnxnp	SNP	T
chr1_3799983	3799983	25.33148598	nnxnp	SNP	T
chr1_3800190	3800190	25.35494969	nnxnp	SNP	C
chr1_3800265	3800265	25.51553745	nnxnp	SNP	A
chr1_3813694	3813694	25.52910593	nnxnp	SNP	T
chr1_3813930	3813930	25.52910593	nnxnp	SNP	T
chr1_3813931	3813931	25.54075532	nnxnp	SNP	C
chr1_3813951	3813951	25.55238973	nnxnp	SNP	A
chr1_3833335	3833335	25.56624306	nnxnp	SNP	G
chr1_3833370	3833370	25.5805162	nnxnp	SNP	A
chr1_3834065	3834065	25.59397972	lmxll	SNP	C
chr1_3834066	3834066	25.62248101	nnxnp	SNP	G
chr1_3834107	3834107	25.62248101	lmxll	SNP	A
chr1_3834113	3834113	25.64595972	lmxll	SNP	T
chr1_3835944	3835944	25.6460047	nnxnp	SNP	G
chr1_3835951	3835951	25.67342651	lmxll	SNP	G
chr1_3836034	3836034	25.69344188	efxeg	SNP	C,G
chr1_3841120	3841120	25.70513626	lmxll	SNP	A
chr1_3855844	3855844	25.72855499	nnxnp	SNP	C
chr1_3855901	3855901	25.74044428	nnxnp	SNP	T
chr1_3856069	3856069	25.76522736	nnxnp	SNP	T
chr1_3856159	3856159	25.79221438	nnxnp	SNP	C
chr1_3860639	3860639	25.8632652	lmxll	SNP	T
chr1_3860675	3860675	25.8632652	nnxnp	SNP	T
chr1_3864815	3864815	25.8632652	lmxll	SNP	C
chr1_3873410	3873410	25.8632652	lmxll	SNP	T
chr1_3875597	3875597	25.93809421	nnxnp	SNP	G
chr1_3878214	3878214	26.25964455	nnxnp	SNP	T
chr1_3878224	3878224	26.29669173	nnxnp	SNP	G
chr1_3878225	3878225	26.55345823	nnxnp	SNP	C
chr1_3880715	3880715	26.64119603	nnxnp	SNP	G
chr1_3880724	3880724	26.64119603	nnxnp	SNP	A
chr1_3888597	3888597	26.64119603	nnxnp	INDEL	C
chr1_3888602	3888602	26.69806368	nnxnp	SNP	G
chr1_3891038	3891038	26.71903859	nnxnp	SNP	A
chr1_3892502	3892502	26.73566559	nnxnp	SNP	A
chr1_3893343	3893343	26.7549913	nnxnp	SNP	C
chr1_3895335	3895335	26.76349221	nnxnp	SNP	G
chr1_3897578	3897578	26.80145395	nnxnp	SNP	A
chr1_3900579	3900579	26.82985029	nnxnp	SNP	A
chr1_3900605	3900605	26.91249054	nnxnp	SNP	T
chr1_3902445	3902445	26.92640385	nnxnp	SNP	C
chr1_3902470	3902470	27.10289896	nnxnp	SNP	T
chr1_3906110	3906110	27.11453336	nnxnp	SNP	T
chr1_3906215	3906215	27.27437148	nnxnp	SNP	T
chr1_3911682	3911682	27.30080377	nnxnp	SNP	T
chr1_3912249	3912249	27.30080377	nnxnp	SNP	C
chr1_3912277	3912277	27.30080377	nnxnp	SNP	C
chr1_3917464	3917464	27.31356263	nnxnp	SNP	T
chr1_3917551	3917551	27.4462788	nnxnp	SNP	C
chr1_3920390	3920390	27.46272589	nnxnp	SNP	T
chr1_3920452	3920452	27.52554567	lmxll	SNP	A
chr1_3920473	3920473	27.73659916	nnxnp	SNP	T
chr1_3920494	3920494	27.75298628	nnxnp	SNP	C
chr1_3920618	3920618	27.77550545	nnxnp	SNP	A
chr1_3922387	3922387	27.81895455	nnxnp	SNP	A
chr1_3930443	3930443	27.95987177	nnxnp	SNP	C
chr1_3930461	3930461	27.95987177	nnxnp	SNP	C
chr1_3932220	3932220	27.95987177	nnxnp	INDEL	G
chr1_3932231	3932231	27.98177623	lmxll	SNP	T
chr1_3941742	3941742	27.98177623	nnxnp	SNP	T
chr1_3946673	3946673	28.07126819	lmxll	SNP	T
chr1_3960649	3960649	28.08777525	nnxnp	SNP	C
chr1_3960931	3960931	28.13732642	nnxnp	SNP	G
chr1_3968945	3968945	28.14896082	nnxnp	SNP	T
chr1_3969211	3969211	28.16587269	nnxnp	SNP	A
chr1_3970898	3970898	28.21993668	nnxnp	SNP	G
chr1_3971454	3971454	28.21993668	nnxnp	SNP	T
chr1_3975757	3975757	28.23596397	nnxnp	SNP	A
chr1_3977153	3977153	28.24049179	nnxnp	SNP	A
chr1_3977164	3977164	28.32413656	nnxnp	SNP	T
chr1_3977388	3977388	28.3259207	nnxnp	SNP	T
chr1_3979193	3979193	28.41377845	nnxnp	SNP	G
chr1_3986654	3986654	28.41737672	nnxnp	SNP	G
chr1_3989086	3989086	28.47982168	lmxll	SNP	G
chr1_3990911	3990911	28.47982168	lmxll	SNP	A
chr1_3996052	3996052	28.539448	nnxnp	SNP	G
chr1_3996505	3996505	28.53950797	lmxll	SNP	A
chr1_3996552	3996552	28.58330191	lmxll	SNP	A
chr1_3996790	3996790	28.61288268	nnxnp	SNP	A
chr1_3996967	3996967	28.65126422	lmxll	SNP	A,*
chr1_4001922	4001922	28.65409786	nnxnp	SNP	T
chr1_4005960	4005960	28.89417738	lmxll	INDEL	C
chr1_4006145	4006145	28.92215393	nnxnp	SNP	T
chr1_4007351	4007351	28.92290357	lmxll	SNP	T
chr1_4012894	4012894	29.25234011	lmxll	SNP	T
chr1_4012895	4012895	29.30328561	lmxll	SNP	T
chr1_4012967	4012967	29.30328561	lmxll	SNP	A
chr1_4014523	4014523	29.37519102	lmxll	SNP	C
chr1_4027992	4027992	29.37519102	nnxnp	SNP	T
chr1_4028010	4028010	29.41049904	nnxnp	SNP	A
chr1_4032096	4032096	29.41049904	nnxnp	SNP	T
chr1_4033046	4033046	29.49490844	nnxnp	SNP	C
chr1_4033111	4033111	29.49490844	nnxnp	SNP	A
chr1_4033317	4033317	29.5544598	nnxnp	SNP	T
chr1_4033338	4033338	29.58978281	lmxll	SNP	C
chr1_4035477	4035477	29.58978281	nnxnp	SNP	T
chr1_4038655	4038655	29.66180817	nnxnp	SNP	A
chr1_4052098	4052098	29.66186814	lmxll	SNP	C
chr1_4067299	4067299	29.89304195	lmxll	INDEL	A
chr1_4069326	4069326	29.9064455	hkxhk	SNP	C
chr1_4083499	4083499	29.9064455	nnxnp	SNP	C
chr1_4085400	4085400	29.91214276	nnxnp	SNP	A
chr1_4085438	4085438	30.00349382	nnxnp	SNP	G
chr1_4095749	4095749	30.00349382	lmxll	SNP	T
chr1_4096093	4096093	30.0413806	lmxll	SNP	C
chr1_4097613	4097613	30.06225056	nnxnp	SNP	G
chr1_4097706	4097706	30.30960159	nnxnp	SNP	A
chr1_4097853	4097853	30.32159582	nnxnp	SNP	G
chr1_4099325	4099325	30.34499956	nnxnp	SNP	T
chr1_4099359	4099359	30.34499956	nnxnp	SNP	A
chr1_4099383	4099383	30.38032257	nnxnp	SNP	G
chr1_4099431	4099431	30.38032257	nnxnp	SNP	C
chr1_4101190	4101190	30.55681768	nnxnp	SNP	A
chr1_4101400	4101400	30.73377757	nnxnp	SNP	C
chr1_4101512	4101512	30.75731624	nnxnp	SNP	A
chr1_4101788	4101788	30.78701696	nnxnp	SNP	C
chr1_4101825	4101825	30.80740715	nnxnp	SNP	A
chr1_4106655	4106655	30.96562605	lmxll	SNP	C
chr1_4106716	4106716	31.11317008	nnxnp	SNP	G
chr1_4106722	4106722	31.12230069	nnxnp	SNP	C
chr1_4110520	4110520	31.12898748	lmxll	SNP	C
chr1_4112187	4112187	31.13314048	lmxll	SNP	C
chr1_4114887	4114887	31.13634894	nnxnp	SNP	G
chr1_4114897	4114897	31.14501477	nnxnp	INDEL	T
chr1_4122625	4122625	31.14921275	hkxhk	INDEL	T
chr1_4122804	4122804	31.15282601	nnxnp	SNP	T
chr1_4123000	4123000	31.2135618	lmxll	SNP	G
chr1_4124424	4124424	31.2135618	nnxnp	INDEL	A
chr1_4124540	4124540	31.23389202	nnxnp	SNP	C
chr1_4128742	4128742	31.24306761	lmxll	SNP	G
chr1_4128895	4128895	31.25845021	nnxnp	SNP	G
chr1_4129010	4129010	31.26755083	hkxhk	SNP	G
chr1_4129374	4129374	31.28105933	nnxnp	INDEL	G
chr1_4139375	4139375	31.35579838	lmxll	SNP	A
chr1_4142500	4142500	31.37938204	nnxnp	SNP	A
chr1_4145374	4145374	31.37938204	hkxhk	SNP	C
chr1_4151011	4151011	31.37938204	lmxll	INDEL	AT
chr1_4152490	4152490	31.37938204	nnxnp	SNP	A
chr1_4152528	4152528	31.37938204	nnxnp	SNP	T
chr1_4152721	4152721	31.41050707	nnxnp	SNP	T
chr1_4152759	4152759	31.42023739	nnxnp	SNP	G
chr1_4158248	4158248	31.42909813	nnxnp	SNP	G
chr1_4158341	4158341	31.4472394	lmxll	SNP	A
chr1_4158425	4158425	31.4472394	nnxnp	SNP	A,C
chr1_4158485	4158485	31.4472394	hkxhk	SNP	A
chr1_4158489	4158489	31.47852935	lmxll	SNP	T
chr1_4168530	4168530	31.48813973	lmxll	SNP	A
chr1_4168572	4168572	31.50365727	nnxnp	SNP	A
chr1_4175038	4175038	31.52196346	nnxnp	SNP	T
chr1_4192169	4192169	31.54232367	lmxll	SNP	C
chr1_4192173	4192173	31.62830731	hkxhk	SNP	T
chr1_4192415	4192415	31.64178583	lmxll	SNP	C
chr1_4200476	4200476	31.71883377	nnxnp	SNP	G
chr1_4200487	4200487	31.72919379	nnxnp	SNP	A
chr1_4203793	4203793	31.76787518	hkxhk	SNP	G
chr1_4204052	4204052	31.76787518	lmxll	SNP	A
chr1_4204238	4204238	31.7882054	nnxnp	SNP	G
chr1_4204428	4204428	31.7882054	nnxnp	SNP	C
chr1_4204455	4204455	31.80853562	nnxnp	SNP	T
chr1_4204465	4204465	31.80853562	nnxnp	SNP	A
chr1_4204469	4204469	31.83396339	nnxnp	SNP	T
chr1_4209263	4209263	31.84244931	hkxhk	SNP	T
chr1_4211228	4211228	31.85592783	hkxhk	SNP	A
chr1_4211425	4211425	31.85592783	lmxll	SNP	T
chr1_4213381	4213381	31.89928698	hkxhk	SNP	T
chr1_4217005	4217005	31.92463978	lmxll	SNP	C
chr1_4217202	4217202	31.92463978	nnxnp	SNP	A
chr1_4218908	4218908	31.93134156	lmxll	SNP	A
chr1_4219685	4219685	31.93134156	nnxnp	SNP	T
chr1_4229990	4229990	31.94074204	nnxnp	SNP	G
chr1_4230020	4230020	31.94777365	nnxnp	SNP	C
chr1_4230117	4230117	31.9564095	nnxnp	SNP	A
chr1_4230134	4230134	31.9591082	lmxll	SNP	A
chr1_4232196	4232196	31.9591082	nnxnp	SNP	G
chr1_4232201	4232201	31.9591082	lmxll	SNP	A
chr1_4232202	4232202	31.99339671	lmxll	SNP	G
chr1_4235293	4235293	31.99339671	nnxnp	SNP	G
chr1_4238561	4238561	32.01555605	lmxll	SNP	A
chr1_4238599	4238599	32.02723543	lmxll	SNP	G
chr1_4240778	4240778	32.02723543	lmxll	SNP	T
chr1_4243763	4243763	32.02723543	lmxll	SNP	C
chr1_4245373	4245373	32.02723543	lmxll	SNP	C
chr1_4252502	4252502	32.16130095	lmxll	SNP	T
chr1_4254390	4254390	32.16695323	hkxhk	SNP	T
chr1_4254410	4254410	32.16714814	hkxhk	SNP	C
chr1_4257353	4257353	32.16831758	lmxll	SNP	G
chr1_4293474	4293474	32.42279018	lmxll	SNP	T
chr1_4299100	4299100	32.42279018	nnxnp	INDEL	CTT
chr1_4300420	4300420	32.45030195	lmxll	SNP	A
chr1_4300428	4300428	32.67510382	lmxll	SNP	A
chr1_4316232	4316232	32.68186557	lmxll	INDEL	GA
chr1_4329860	4329860	32.72116167	nnxnp	SNP	T
chr1_4335589	4335589	32.72574946	lmxll	SNP	G
chr1_4335651	4335651	32.73230131	hkxhk	SNP	C
chr1_4335653	4335653	32.78380154	lmxll	SNP	G
chr1_4342196	4342196	32.81348726	lmxll	INDEL	ACCC,A
chr1_4342215	4342215	32.81348726	lmxll	SNP	C
chr1_4343991	4343991	32.84728101	lmxll	SNP	C
chr1_4347318	4347318	32.85600681	nnxnp	SNP	C
chr1_4347342	4347342	32.98597929	nnxnp	SNP	A
chr1_4349825	4349825	32.98740361	lmxll	SNP	T
chr1_4353710	4353710	32.98870798	lmxll	SNP	T
chr1_4371533	4371533	33.02427088	nnxnp	SNP	C
chr1_4371587	4371587	33.02427088	nnxnp	SNP	C
chr1_4371598	4371598	33.02427088	lmxll	SNP	T
chr1_4373029	4373029	33.03097265	nnxnp	SNP	A
chr1_4382628	4382628	33.03097265	hkxhk	SNP	A
chr1_4384543	4384543	33.05130287	lmxll	SNP	C
chr1_4386621	4386621	33.06481138	lmxll	SNP	A
chr1_4386634	4386634	33.11350796	lmxll	SNP	G
chr1_4386707	4386707	33.11350796	nnxnp	SNP	C
chr1_4389677	4389677	33.12701646	nnxnp	INDEL	TAATGAATTACTGTAAATCCTACCAAG
chr1_4389701	4389701	33.1994916	nnxnp	SNP	T
chr1_4391284	4391284	33.22351005	nnxnp	SNP	A
chr1_4391680	4391680	33.22351005	nnxnp	SNP	T
chr1_4401745	4401745	33.24740855	nnxnp	SNP	C
chr1_4401759	4401759	33.24740855	nnxnp	SNP	G
chr1_4414267	4414267	33.25211629	nnxnp	SNP	C
chr1_4414285	4414285	33.25301585	nnxnp	SNP	T
chr1_4414340	4414340	33.26713906	nnxnp	SNP	G
chr1_4414343	4414343	33.29576029	nnxnp	SNP	G
chr1_4417035	4417035	33.29576029	lmxll	SNP	C
chr1_4417044	4417044	33.33292742	hkxhk	SNP	T
chr1_4418913	4418913	33.33381199	nnxnp	SNP	C
chr1_4418994	4418994	33.33451665	nnxnp	SNP	C
chr1_4419087	4419087	33.54210681	nnxnp	SNP	T
chr1_4420552	4420552	33.54231671	hkxhk	SNP	G
chr1_4420573	4420573	33.73133079	lmxll	SNP	C
chr1_4420583	4420583	33.73133079	lmxll	SNP	T
chr1_4420604	4420604	33.73133079	hkxhk	INDEL	GTCC
chr1_4421422	4421422	33.74746303	hkxhk	SNP	C
chr1_4424615	4424615	33.75510936	lmxll	SNP	T
chr1_4440037	4440037	33.76698364	nnxnp	SNP	T
chr1_4441702	4441702	33.76698364	nnxnp	SNP	T
chr1_4444094	4444094	33.76698364	nnxnp	SNP	A
chr1_4444144	4444144	33.76698364	nnxnp	SNP	A
chr1_4448043	4448043	33.77662401	nnxnp	SNP	T
chr1_4450288	4450288	33.78365563	lmxll	SNP	C
chr1_4469459	4469459	33.79584476	nnxnp	SNP	C
chr1_4469520	4469520	33.80714933	nnxnp	SNP	C
chr1_4469530	4469530	33.83398642	nnxnp	SNP	T
chr1_4473578	4473578	33.8531472	lmxll	SNP	C
chr1_4473779	4473779	33.90335805	lmxll	SNP	T
chr1_4477283	4477283	33.93934074	nnxnp	SNP	G
chr1_4477303	4477303	33.94667222	nnxnp	SNP	C
chr1_4477428	4477428	33.94667222	lmxll	SNP	T
chr1_4478394	4478394	33.94667222	lmxll	SNP	C
chr1_4483627	4483627	33.94667222	nnxnp	SNP	T
chr1_4483658	4483658	34.04037715	nnxnp	SNP	T
chr1_4484954	4484954	34.04037715	nnxnp	SNP	G
chr1_4485155	4485155	34.06070737	nnxnp	SNP	G
chr1_4485190	4485190	34.06740914	nnxnp	SNP	G
chr1_4487821	4487821	34.10169765	lmxll	SNP	G
chr1_4506008	4506008	34.10169765	lmxll	INDEL	AG
chr1_4515217	4515217	34.10169765	nnxnp	SNP	T
chr1_4518590	4518590	34.11805478	nnxnp	SNP	T
chr1_4521251	4521251	34.12205786	hkxhk	SNP	C
chr1_4521272	4521272	34.16094915	lmxll	SNP	A
chr1_4521462	4521462	34.16390273	nnxnp	SNP	G
chr1_4521488	4521488	34.23144525	nnxnp	SNP	G
chr1_4521565	4521565	34.23144525	nnxnp	SNP	T
chr1_4522403	4522403	34.27284034	nnxnp	SNP	C
chr1_4536988	4536988	34.27284034	lmxll	SNP	T
chr1_4539318	4539318	34.29414509	lmxll	SNP	C
chr1_4541500	4541500	34.29990232	hkxhk	SNP	T
chr1_4545015	4545015	34.29990232	nnxnp	SNP	G
chr1_4545031	4545031	34.32715921	nnxnp	SNP	C
chr1_4545045	4545045	34.32715921	nnxnp	SNP	C
chr1_4545120	4545120	34.34299159	nnxnp	SNP	T
chr1_4545153	4545153	34.37485127	nnxnp	SNP	C
chr1_4545398	4545398	34.37485127	lmxll	SNP	T
chr1_4545452	4545452	34.40915477	nnxnp	SNP	A
chr1_4545458	4545458	34.40915477	nnxnp	SNP	G
chr1_4545481	4545481	34.40915477	hkxhk	SNP	G
chr1_4545484	4545484	34.44206394	hkxhk	SNP	G
chr1_4552725	4552725	34.45007009	nnxnp	INDEL	G
chr1_4555893	4555893	34.45007009	nnxnp	INDEL	CAT
chr1_4555971	4555971	34.46354861	nnxnp	SNP	A
chr1_4558888	4558888	34.4708501	nnxnp	SNP	A
chr1_4558967	4558967	34.47176466	nnxnp	SNP	T
chr1_4559028	4559028	34.47185461	nnxnp	SNP	T
chr1_4560227	4560227	34.50447892	nnxnp	SNP	A
chr1_4562368	4562368	34.50447892	lmxll	SNP	T
chr1_4564481	4564481	34.50900674	nnxnp	SNP	G
chr1_4564501	4564501	34.50900674	nnxnp	SNP	G
chr1_4564519	4564519	34.50900674	nnxnp	SNP	G
chr1_4569252	4569252	34.54373004	lmxll	INDEL	C
chr1_4583717	4583717	34.55924758	lmxll	SNP	T
chr1_4583727	4583727	34.56740366	lmxll	SNP	G
chr1_4592144	4592144	34.59317626	lmxll	SNP	A
chr1_4622672	4622672	34.59987804	lmxll	SNP	T
chr1_4622716	4622716	34.61335655	lmxll	SNP	A
chr1_4624020	4624020	34.61335655	hkxhk	SNP	T
chr1_4624111	4624111	34.63583074	hkxhk	SNP	T
chr1_4632057	4632057	34.65767524	hkxhk	SNP	C
chr1_4636604	4636604	34.65998413	lmxll	SNP	T
chr1_4636629	4636629	34.68221843	hkxhk	SNP	G
chr1_4641343	4641343	34.71650694	hkxhk	SNP	T
chr1_4641447	4641447	34.71650694	hkxhk	SNP	C
chr1_4653989	4653989	34.72478296	hkxhk	SNP	C
chr1_4654052	4654052	34.75042063	hkxhk	SNP	T
chr1_4657787	4657787	34.75042063	lmxll	INDEL	G
chr1_4658969	4658969	34.78527886	lmxll	SNP	A
chr1_4674984	4674984	34.78704801	hkxhk	SNP	A
chr1_4677305	4677305	34.79235546	nnxnp	SNP	A
chr1_4677313	4677313	34.79469433	nnxnp	SNP	G
chr1_4677315	4677315	34.80055651	nnxnp	SNP	C
chr1_4677405	4677405	34.82391528	nnxnp	INDEL	A
chr1_4682382	4682382	34.82391528	lmxll	SNP	A
chr1_4684315	4684315	34.83757371	nnxnp	SNP	T
chr1_4684473	4684473	34.83757371	lmxll	SNP	A
chr1_4684520	4684520	34.90081329	nnxnp	SNP	G
chr1_4684599	4684599	34.90081329	hkxhk	SNP	A
chr1_4684614	4684614	34.90081329	lmxll	SNP	G
chr1_4687286	4687286	35.0103656	nnxnp	SNP	C
chr1_4687308	4687308	35.0103656	nnxnp	SNP	G
chr1_4687326	4687326	35.01706737	nnxnp	SNP	C
chr1_4687336	4687336	35.17687551	lmxll	SNP	G
chr1_4687349	4687349	35.17687551	nnxnp	SNP	A
chr1_4689071	4689071	35.17687551	hkxhk	SNP	G
chr1_4689308	4689308	35.19042899	hkxhk	SNP	A
chr1_4690123	4690123	35.31226039	nnxnp	SNP	T
chr1_4690371	4690371	35.44220289	nnxnp	SNP	C
chr1_4690426	4690426	35.44220289	hkxhk	SNP	C
chr1_4692370	4692370	35.44220289	lmxll	SNP	G
chr1_4694210	4694210	35.44220289	nnxnp	SNP	A
chr1_4694211	4694211	35.44220289	nnxnp	SNP	G
chr1_4694315	4694315	35.44220289	lmxll	SNP	G
chr1_4700739	4700739	35.44220289	nnxnp	SNP	G
chr1_4700745	4700745	35.46253311	lmxll	SNP	C
chr1_4708850	4708850	35.46253311	hkxhk	SNP	G
chr1_4709822	4709822	35.51409331	nnxnp	SNP	C
chr1_4709912	4709912	35.61042198	lmxll	SNP	T
chr1_4723528	4723528	35.66343648	hkxhk	INDEL	A
chr1_4723814	4723814	35.71061879	lmxll	INDEL	T
chr1_4729099	4729099	35.75801099	lmxll	SNP	C
chr1_4736783	4736783	35.75817591	nnxnp	SNP	T
chr1_4736906	4736906	35.80669258	lmxll	SNP	T
chr1_4737095	4737095	35.80669258	hkxhk	SNP	T
chr1_4740157	4740157	35.8201711	lmxll	INDEL	A
chr1_4747877	4747877	35.83340973	nnxnp	SNP	G
chr1_4747893	4747893	35.8336796	nnxnp	SNP	C
chr1_4758051	4758051	35.85400982	lmxll	SNP	T
chr1_4760342	4760342	35.86074158	lmxll	INDEL	AAACTCTT
chr1_4787973	4787973	35.86074158	lmxll	SNP	T
chr1_4788024	4788024	35.86074158	hkxhk	SNP	A
chr1_4788076	4788076	35.8742201	nnxnp	SNP	A
chr1_4790251	4790251	35.8742201	nnxnp	SNP	T
chr1_4790303	4790303	35.88970765	nnxnp	INDEL	TG
chr1_4819839	4819839	35.89745892	nnxnp	SNP	G
chr1_4826039	4826039	35.92389121	lmxll	SNP	G
chr1_4826048	4826048	35.93129765	hkxhk	SNP	G
chr1_4841478	4841478	35.93225718	hkxhk	SNP	C,*
chr1_4841481	4841481	35.94648534	hkxhk	SNP	G,*
chr1_4849512	4849512	35.98368245	nnxnp	SNP	C
chr1_4849896	4849896	35.99038423	nnxnp	SNP	C
chr1_4849898	4849898	35.99038423	nnxnp	SNP	G
chr1_4849902	4849902	35.99943987	nnxnp	SNP	G
chr1_4849905	4849905	36.01737125	nnxnp	SNP	T
chr1_4849925	4849925	36.03392328	nnxnp	SNP	A
chr1_4855694	4855694	36.08489877	lmxll	SNP	G
chr1_4856127	4856127	36.0931448	lmxll	SNP	T
chr1_4857930	4857930	36.0931448	nnxnp	SNP	T
chr1_4867989	4867989	36.31766181	nnxnp	SNP	G
chr1_4871195	4871195	36.31766181	nnxnp	SNP	T
chr1_4871205	4871205	36.56711183	hkxhk	SNP	C
chr1_4871207	4871207	36.59258458	nnxnp	SNP	A
chr1_4871211	4871211	36.60101052	nnxnp	SNP	A
chr1_4881475	4881475	36.60288462	lmxll	SNP	T
chr1_4881489	4881489	36.6151937	lmxll	SNP	A
chr1_4892222	4892222	36.62471412	hkxhk	SNP	A
chr1_4892260	4892260	36.70898859	lmxll	SNP	A
chr1_4892320	4892320	36.80326324	nnxnp	SNP	A
chr1_4896810	4896810	36.81120942	lmxll	SNP	A
chr1_4906107	4906107	36.81120942	hkxhk	SNP	C
chr1_4911199	4911199	36.81860087	lmxll	SNP	T
chr1_4911221	4911221	36.81860087	lmxll	SNP	A
chr1_4912391	4912391	36.83194445	nnxnp	SNP	G
chr1_4912398	4912398	36.83551273	nnxnp	SNP	C
chr1_4912413	4912413	36.86023584	lmxll	SNP	T
chr1_4912615	4912615	36.86023584	nnxnp	SNP	G
chr1_4916612	4916612	36.88266505	lmxll	SNP	A
chr1_4920176	4920176	36.88266505	lmxll	SNP	T
chr1_4924686	4924686	36.91275558	lmxll	SNP	C
chr1_4924708	4924708	36.91275558	lmxll	SNP	T
chr1_4924713	4924713	36.91275558	nnxnp	SNP	C
chr1_4924717	4924717	36.92762843	nnxnp	INDEL	G
chr1_4924974	4924974	36.93609935	lmxll	SNP	C
chr1_4925171	4925171	36.93731377	lmxll	SNP	T
chr1_4925214	4925214	36.99689511	hkxhk	SNP	C
chr1_4927275	4927275	37.00515614	hkxhk	SNP	C
chr1_4928441	4928441	37.00515614	nnxnp	SNP	T
chr1_4929172	4929172	37.02758535	hkxhk	SNP	C
chr1_4929197	4929197	37.02758535	lmxll	SNP	T
chr1_4929207	4929207	37.02758535	lmxll	SNP	C
chr1_4937425	4937425	37.02758535	nnxnp	SNP	G
chr1_4937439	4937439	37.05460235	nnxnp	SNP	C
chr1_4937442	4937442	37.08019504	nnxnp	SNP	C
chr1_4943782	4943782	37.10251931	nnxnp	SNP	C
chr1_4943804	4943804	37.10251931	nnxnp	SNP	C
chr1_4943828	4943828	37.10991075	nnxnp	SNP	T
chr1_4944022	4944022	37.10991075	nnxnp	SNP	T
chr1_4944049	4944049	37.22045258	nnxnp	SNP	G
chr1_4947373	4947373	37.22803893	nnxnp	SNP	T
chr1_4947391	4947391	37.2460003	nnxnp	SNP	C
chr1_4947539	4947539	37.30228322	lmxll	SNP	T
chr1_4948841	4948841	37.3052368	hkxhk	SNP	G
chr1_4955614	4955614	37.30748572	nnxnp	SNP	C
chr1_4955618	4955618	37.32912032	nnxnp	SNP	C
chr1_4956606	4956606	37.34601719	nnxnp	SNP	G
chr1_4960744	4960744	37.3578465	lmxll	SNP	T
chr1_4966297	4966297	37.3746834	lmxll	SNP	C
chr1_4966299	4966299	37.3746834	lmxll	SNP	A
chr1_4966349	4966349	37.3746834	nnxnp	SNP	A
chr1_4966363	4966363	37.3746834	lmxll	SNP	G
chr1_4966667	4966667	37.38955625	lmxll	SNP	C
chr1_4981889	4981889	37.38955625	nnxnp	SNP	C
chr1_4984414	4984414	37.52353181	nnxnp	SNP	G
chr1_4989118	4989118	37.52386165	nnxnp	SNP	A
chr1_4989368	4989368	37.53933421	nnxnp	INDEL	AAAGGGAAAGAAAC
chr1_4990328	4990328	37.55455189	hkxhk	SNP	T
chr1_4990336	4990336	37.57747586	hkxhk	SNP	G
chr1_4990345	4990345	37.57788067	hkxhk	SNP	G
chr1_4990415	4990415	37.58111911	hkxhk	SNP	T
chr1_4998593	4998593	37.59354813	lmxll	SNP	T
chr1_5004703	5004703	37.64145009	lmxll	SNP	G
chr1_5006136	5006136	37.64145009	nnxnp	SNP	T
chr1_5006140	5006140	37.64145009	efxeg	INDEL	A,AT
chr1_5009291	5009291	37.68302509	hkxhk	SNP	C
chr1_5009322	5009322	37.68449439	hkxhk	SNP	A
chr1_5009381	5009381	37.68722307	hkxhk	SNP	G
chr1_5009399	5009399	37.70278559	hkxhk	SNP	T
chr1_5009913	5009913	37.74762902	hkxhk	SNP	A
chr1_5009983	5009983	37.75675963	hkxhk	SNP	C
chr1_5016613	5016613	37.75776415	lmxll	SNP	A
chr1_5016766	5016766	37.75830389	hkxhk	SNP	A
chr1_5016767	5016767	37.81873982	hkxhk	SNP	T
chr1_5016783	5016783	37.81873982	hkxhk	SNP	G
chr1_5016949	5016949	37.8466414	hkxhk	SNP	C
chr1_5016969	5016969	37.85616182	hkxhk	SNP	G
chr1_5018756	5018756	37.85616182	nnxnp	SNP	G
chr1_5018805	5018805	37.88625234	nnxnp	SNP	T
chr1_5019027	5019027	37.88625234	nnxnp	SNP	C
chr1_5019279	5019279	37.90334412	lmxll	SNP	G
chr1_5019295	5019295	37.9048434	lmxll	SNP	T
chr1_5019296	5019296	37.90989597	lmxll	SNP	G
chr1_5019373	5019373	37.94436439	lmxll	SNP	T
chr1_5019509	5019509	37.94598361	nnxnp	SNP	G
chr1_5019527	5019527	37.9470481	nnxnp	SNP	T
chr1_5022461	5022461	37.98138159	hkxhk	INDEL	G
chr1_5022647	5022647	37.99542983	lmxll	SNP	A
chr1_5026119	5026119	37.99542983	nnxnp	SNP	A
chr1_5026149	5026149	38.01030268	nnxnp	SNP	C
chr1_5030820	5030820	38.01030268	hkxhk	SNP	A
chr1_5032998	5032998	38.01769412	lmxll	SNP	C
chr1_5033050	5033050	38.03255198	nnxnp	SNP	T
chr1_5033068	5033068	38.03255198	hkxhk	INDEL	A
chr1_5035085	5035085	38.07043875	lmxll	SNP	T
chr1_5035135	5035135	38.07046874	hkxhk	SNP	C
chr1_5035181	5035181	38.12729141	hkxhk	SNP	T
chr1_5035193	5035193	38.23447486	hkxhk	SNP	A
chr1_5038426	5038426	38.25820844	lmxll	INDEL	T
chr1_5042951	5042951	38.25820844	hkxhk	SNP	G
chr1_5056619	5056619	38.37926022	nnxnp	SNP	A
chr1_5056840	5056840	38.39597718	nnxnp	SNP	A
chr1_5056888	5056888	38.51494495	nnxnp	INDEL	A
chr1_5061702	5061702	38.51494495	nnxnp	SNP	A
chr1_5061909	5061909	38.51494495	nnxnp	SNP	T
chr1_5064235	5064235	38.5298178	nnxnp	SNP	C
chr1_5064283	5064283	38.54064259	nnxnp	SNP	A
chr1_5065101	5065101	38.54484057	lmxll	SNP	G
chr1_5070562	5070562	38.55569535	nnxnp	SNP	A
chr1_5070907	5070907	38.56707488	lmxll	SNP	A
chr1_5070909	5070909	38.56707488	lmxll	SNP	A
chr1_5070951	5070951	38.57448132	lmxll	SNP	C
chr1_5070982	5070982	38.57448132	lmxll	SNP	T
chr1_5071018	5071018	38.59691053	hkxhk	SNP	C
chr1_5071130	5071130	38.59691053	hkxhk	SNP	G
chr1_5071344	5071344	38.59691053	lmxll	SNP	C
chr1_5071352	5071352	38.61178338	lmxll	SNP	T
chr1_5071377	5071377	38.61178338	nnxnp	SNP	A
chr1_5071402	5071402	38.61178338	lmxll	SNP	A
chr1_5071434	5071434	38.62974474	nnxnp	SNP	A
chr1_5071535	5071535	38.65668678	lmxll	SNP	T
chr1_5071682	5071682	38.65668678	nnxnp	SNP	G
chr1_5082899	5082899	38.67154463	nnxnp	SNP	T
chr1_5086757	5086757	38.68943103	lmxll	SNP	T
chr1_5086760	5086760	38.71644803	lmxll	SNP	G
chr1_5101060	5101060	38.71644803	hkxhk	SNP	G
chr1_5103552	5103552	38.73889224	lmxll	SNP	T
chr1_5124023	5124023	38.73889224	nnxnp	SNP	A
chr1_5126275	5126275	38.76898277	nnxnp	SNP	T
chr1_5136931	5136931	38.76898277	nnxnp	SNP	A
chr1_5136960	5136960	38.80111231	nnxnp	SNP	T
chr1_5138648	5138648	38.81676478	nnxnp	SNP	C
chr1_5142053	5142053	38.81746944	nnxnp	SNP	A
chr1_5142056	5142056	38.89980984	nnxnp	SNP	A
chr1_5142244	5142244	38.90784598	nnxnp	SNP	T
chr1_5142245	5142245	38.90784598	nnxnp	SNP	A
chr1_5178990	5178990	38.91523742	nnxnp	SNP	G
chr1_5181382	5181382	38.92604722	nnxnp	SNP	T
chr1_5181401	5181401	38.96032074	nnxnp	SNP	C
chr1_5181478	5181478	38.96032074	nnxnp	SNP	T
chr1_5183354	5183354	38.96032074	nnxnp	SNP	T
chr1_5191159	5191159	38.96032074	nnxnp	SNP	G
chr1_5192912	5192912	38.96771218	nnxnp	SNP	T
chr1_5196090	5196090	38.98257003	nnxnp	SNP	G
chr1_5203671	5203671	38.98257003	nnxnp	SNP	A
chr1_5203709	5203709	39.02825306	nnxnp	SNP	T
chr1_5203838	5203838	39.02825306	nnxnp	SNP	G
chr1_5203848	5203848	39.02825306	nnxnp	SNP	G
chr1_5203873	5203873	39.04312591	nnxnp	SNP	C
chr1_5209889	5209889	39.04312591	nnxnp	SNP	G
chr1_5212662	5212662	39.05799875	nnxnp	SNP	T
chr1_5212690	5212690	39.05799875	nnxnp	SNP	T
chr1_5212764	5212764	39.09062306	nnxnp	SNP	A
chr1_5222027	5222027	39.0986592	nnxnp	SNP	C
chr1_5222702	5222702	39.12936443	nnxnp	SNP	T
chr1_5222730	5222730	39.13134348	nnxnp	SNP	G
chr1_5222791	5222791	39.23279968	nnxnp	SNP	T
chr1_5224273	5224273	39.23279968	nnxnp	INDEL	G
chr1_5224524	5224524	39.24767252	nnxnp	SNP	C
chr1_5230685	5230685	39.24767252	nnxnp	SNP	C
chr1_5231547	5231547	39.2743447	nnxnp	SNP	T
chr1_5233251	5233251	39.33626491	nnxnp	SNP	C
chr1_5233257	5233257	39.35430124	nnxnp	SNP	C
chr1_5233270	5233270	39.35430124	nnxnp	SNP	T
chr1_5233335	5233335	39.35430124	nnxnp	SNP	A
chr1_5233341	5233341	39.36169268	nnxnp	SNP	T
chr1_5233504	5233504	39.36169268	nnxnp	SNP	T
chr1_5235000	5235000	39.39178321	nnxnp	SNP	T
chr1_5235007	5235007	39.39917465	nnxnp	SNP	C
chr1_5243698	5243698	39.43701645	nnxnp	INDEL	CAT
chr1_5245963	5245963	39.45944566	nnxnp	SNP	T
chr1_5246019	5246019	39.45944566	nnxnp	SNP	G
chr1_5248468	5248468	39.49728746	nnxnp	SNP	C
chr1_5248477	5248477	39.49728746	nnxnp	SNP	A
chr1_5249831	5249831	39.51532379	nnxnp	SNP	C
chr1_5249889	5249889	39.5177976	nnxnp	SNP	T
chr1_5249894	5249894	39.53661355	nnxnp	SNP	C
chr1_5266756	5266756	39.53661355	nnxnp	SNP	C
chr1_5267246	5267246	39.55905775	nnxnp	SNP	T
chr1_5267425	5267425	39.55905775	nnxnp	SNP	C
chr1_5295317	5295317	39.57727399	lmxll	SNP	G
chr1_5295411	5295411	39.60073771	lmxll	SNP	T
chr1_5298482	5298482	39.61884899	lmxll	SNP	C
chr1_5298496	5298496	39.61884899	nnxnp	SNP	T
chr1_5298510	5298510	39.6412932	nnxnp	SNP	T
chr1_5300959	5300959	39.65616605	lmxll	SNP	C
chr1_5304117	5304117	39.65616605	nnxnp	SNP	T
chr1_5306038	5306038	39.68625657	lmxll	SNP	G
chr1_5306287	5306287	39.68625657	nnxnp	SNP	A
chr1_5306324	5306324	39.69364802	nnxnp	SNP	C
chr1_5306361	5306361	39.69364802	nnxnp	SNP	A
chr1_5314161	5314161	39.73147482	nnxnp	SNP	C
chr1_5314570	5314570	39.73147482	nnxnp	SNP	T
chr1_5322595	5322595	39.73969087	nnxnp	SNP	A
chr1_5322830	5322830	39.81514958	nnxnp	SNP	T
chr1_5324718	5324718	39.83159667	nnxnp	SNP	A
chr1_5324729	5324729	39.84646951	nnxnp	SNP	G
chr1_5324808	5324808	39.86642491	nnxnp	SNP	A
chr1_5324810	5324810	39.87624519	lmxll	SNP	G
chr1_5324965	5324965	39.89111804	nnxnp	SNP	G
chr1_5332940	5332940	39.89111804	nnxnp	SNP	G
chr1_5345671	5345671	39.89111804	lmxll	SNP	A
chr1_5376751	5376751	39.93399741	nnxnp	SNP	T
chr1_5388964	5388964	39.94632149	nnxnp	SNP	G
chr1_5388965	5388965	39.95890044	nnxnp	SNP	A
chr1_5388975	5388975	39.95890044	nnxnp	INDEL	G
chr1_5388976	5388976	39.99672724	nnxnp	INDEL	T,*
chr1_5388988	5388988	40.04930695	nnxnp	SNP	T
chr1_5389012	5389012	40.05833261	nnxnp	SNP	G
chr1_5389068	5389068	40.18634104	nnxnp	SNP	G
chr1_5395949	5395949	40.20203849	lmxll	SNP	A
chr1_5395979	5395979	40.20203849	lmxll	SNP	A
chr1_5396007	5396007	40.21689634	lmxll	SNP	G
chr1_5399182	5399182	40.25785664	lmxll	SNP	T
chr1_5415638	5415638	40.26767692	nnxnp	SNP	A
chr1_5415854	5415854	40.26856149	nnxnp	SNP	C
chr1_5423500	5423500	40.28557831	lmxll	SNP	C
chr1_5427053	5427053	40.30800752	nnxnp	SNP	T
chr1_5433611	5433611	40.33045173	nnxnp	SNP	C
chr1_5433701	5433701	40.33045173	lmxll	INDEL	G
chr1_5448931	5448931	40.33045173	nnxnp	SNP	T
chr1_5451471	5451471	40.33045173	nnxnp	SNP	C
chr1_5468226	5468226	40.33045173	lmxll	SNP	T
chr1_5470468	5470468	40.35288094	lmxll	SNP	G
chr1_5470559	5470559	40.35288094	lmxll	SNP	G
chr1_5475681	5475681	40.36423048	nnxnp	SNP	A
chr1_5475869	5475869	40.37511524	nnxnp	SNP	G
chr1_5475919	5475919	40.38448574	nnxnp	SNP	G
chr1_5477829	5477829	40.41253724	nnxnp	SNP	T
chr1_5480223	5480223	40.41253724	lmxll	SNP	T
chr1_5489877	5489877	40.42178779	lmxll	SNP	T
chr1_5493954	5493954	40.44801018	nnxnp	SNP	C
chr1_5494055	5494055	40.45228313	nnxnp	SNP	T
chr1_5494056	5494056	40.45959961	nnxnp	INDEL	AT
chr1_5522536	5522536	40.48046957	nnxnp	SNP	C
chr1_5522617	5522617	40.48046957	lmxll	SNP	C
chr1_5523244	5523244	40.50291377	lmxll	SNP	T
chr1_5542390	5542390	40.51354366	lmxll	SNP	G
chr1_5542406	5542406	40.52514808	lmxll	SNP	C
chr1_5542620	5542620	40.54002093	lmxll	SNP	A
chr1_5542622	5542622	40.55489377	lmxll	SNP	G
chr1_5542808	5542808	40.55489377	lmxll	SNP	A
chr1_5543018	5543018	40.57831251	nnxnp	SNP	A
chr1_5552247	5552247	40.73461233	lmxll	SNP	A
chr1_5553255	5553255	40.73461233	nnxnp	SNP	T,A
chr1_5553262	5553262	40.74591689	nnxnp	SNP	G
chr1_5553263	5553263	40.75684664	nnxnp	SNP	G
chr1_5560200	5560200	40.76423808	lmxll	SNP	C
chr1_5562537	5562537	40.76423808	nnxnp	SNP	G
chr1_5571688	5571688	40.77263404	nnxnp	SNP	C
chr1_5575871	5575871	40.77321876	lmxll	SNP	C
chr1_5575929	5575929	40.77402837	lmxll	SNP	C
chr1_5578713	5578713	40.79761203	lmxll	INDEL	T
chr1_5578917	5578917	40.82278492	lmxll	SNP	C
chr1_5584962	5584962	40.83368468	lmxll	SNP	G
chr1_5600272	5600272	40.84566392	lmxll	SNP	C
chr1_5604902	5604902	40.84831764	lmxll	SNP	T
chr1_5607476	5607476	40.96013386	nnxnp	SNP	C
chr1_5607577	5607577	40.96013386	nnxnp	SNP	A
chr1_5607822	5607822	41.03815633	lmxll	SNP	T
chr1_5608357	5608357	41.10793277	lmxll	SNP	G
chr1_5609613	5609613	41.10793277	nnxnp	SNP	T
chr1_5612152	5612152	41.13037697	lmxll	SNP	A
chr1_5612178	5612178	41.13037697	lmxll	SNP	A
chr1_5616476	5616476	41.13037697	nnxnp	SNP	A
chr1_5621455	5621455	41.16820378	nnxnp	SNP	T
chr1_5630711	5630711	41.16820378	lmxll	SNP	T
chr1_5630807	5630807	41.17935842	lmxll	SNP	G
chr1_5632803	5632803	41.19045308	nnxnp	SNP	A
chr1_5650893	5650893	41.19045308	lmxll	SNP	C
chr1_5651115	5651115	41.20531093	nnxnp	SNP	C
chr1_5651124	5651124	41.20531093	nnxnp	SNP	T
chr1_5651448	5651448	41.20531093	lmxll	SNP	G
chr1_5652774	5652774	41.20531093	lmxll	SNP	G
chr1_5652856	5652856	41.22018378	nnxnp	SNP	A
chr1_5655582	5655582	41.22018378	nnxnp	SNP	T
chr1_5655678	5655678	41.23505663	nnxnp	SNP	T
chr1_5655727	5655727	41.23505663	nnxnp	INDEL	GA
chr1_5655744	5655744	41.32988601	nnxnp	SNP	G,C
chr1_5656897	5656897	41.32988601	nnxnp	SNP	A
chr1_5656928	5656928	41.35231523	nnxnp	SNP	G
chr1_5656931	5656931	41.35231523	nnxnp	SNP	T
chr1_5658413	5658413	41.38240575	lmxll	SNP	T
chr1_5658836	5658836	41.3972786	nnxnp	SNP	G
chr1_5658878	5658878	41.3972786	nnxnp	SNP	G
chr1_5658915	5658915	41.41213645	nnxnp	SNP	A
chr1_5662135	5662135	41.41213645	nnxnp	SNP	A
chr1_5662167	5662167	41.49850991	nnxnp	SNP	T
chr1_5662171	5662171	41.49850991	nnxnp	SNP	T
chr1_5664906	5664906	41.49850991	nnxnp	SNP	G
chr1_5715275	5715275	41.56016026	lmxll	SNP	T
chr1_5715291	5715291	41.56016026	nnxnp	SNP	G
chr1_5715300	5715300	41.61344463	nnxnp	SNP	A
chr1_5715301	5715301	41.61380445	nnxnp	SNP	C
chr1_5715310	5715310	41.6139094	nnxnp	SNP	T
chr1_5715357	5715357	41.62993669	nnxnp	SNP	G
chr1_5719271	5719271	41.62993669	nnxnp	INDEL	AC
chr1_5725228	5725228	41.62993669	lmxll	SNP	A
chr1_5725425	5725425	41.64497446	nnxnp	SNP	T
chr1_5727294	5727294	41.64497446	nnxnp	SNP	T
chr1_5727315	5727315	41.69972813	nnxnp	SNP	T
chr1_5727321	5727321	41.69972813	nnxnp	SNP	A
chr1_5746256	5746256	41.69972813	nnxnp	SNP	A
chr1_5765456	5765456	41.75751033	nnxnp	SNP	A
chr1_5765465	5765465	41.76307266	nnxnp	SNP	A
chr1_5765709	5765709	41.77418232	nnxnp	SNP	T
chr1_5782191	5782191	41.77418232	lmxll	SNP	T
chr1_5782199	5782199	41.77418232	lmxll	SNP	T
chr1_5782239	5782239	41.78260826	lmxll	SNP	A
chr1_5782403	5782403	41.806027	nnxnp	INDEL	CCAAA
chr1_5782448	5782448	41.87581843	lmxll	SNP	G
chr1_5787260	5787260	41.87581843	lmxll	SNP	C
chr1_5787261	5787261	41.87581843	lmxll	SNP	A
chr1_5787339	5787339	41.91595413	nnxnp	SNP	C
chr1_5797520	5797520	41.94378074	nnxnp	SNP	A
chr1_5797546	5797546	41.94378074	lmxll	SNP	G
chr1_5797580	5797580	41.94378074	nnxnp	SNP	T
chr1_5797581	5797581	42.08655707	nnxnp	SNP	G
chr1_5806439	5806439	42.086707	lmxll	SNP	C
chr1_5806495	5806495	42.086707	lmxll	SNP	C
chr1_5807155	5807155	42.0869019	lmxll	SNP	A
chr1_5807171	5807171	42.09114486	lmxll	SNP	C
chr1_5807879	5807879	42.09906105	lmxll	SNP	G
chr1_5808109	5808109	42.09906105	nnxnp	SNP	A
chr1_5808565	5808565	42.09906105	lmxll	SNP	G
chr1_5808595	5808595	42.11234466	lmxll	SNP	T
chr1_5808633	5808633	42.15182068	lmxll	SNP	T
chr1_5808636	5808636	42.15182068	lmxll	SNP	G
chr1_5808859	5808859	42.15182068	lmxll	SNP	T
chr1_5808873	5808873	42.19619933	lmxll	SNP	G
chr1_5808900	5808900	42.22230178	lmxll	SNP	T
chr1_5808983	5808983	42.22318635	lmxll	SNP	A
chr1_5809205	5809205	42.34998037	lmxll	INDEL	G
chr1_5809562	5809562	42.34998037	lmxll	SNP	T
chr1_5817200	5817200	42.34998037	lmxll	SNP	A
chr1_5820861	5820861	42.35737181	nnxnp	SNP	G
chr1_5821132	5821132	42.37118017	nnxnp	SNP	C
chr1_5832175	5832175	42.37118017	lmxll	SNP	T
chr1_5836520	5836520	42.39485378	nnxnp	SNP	C
chr1_5836609	5836609	42.43304042	nnxnp	SNP	C
chr1_5840776	5840776	42.43304042	lmxll	SNP	G
chr1_5842657	5842657	42.43304042	lmxll	SNP	C
chr1_5842803	5842803	42.45308577	lmxll	INDEL	CA
chr1_5843217	5843217	42.4636407	nnxnp	SNP	A
chr1_5846315	5846315	42.47768894	lmxll	SNP	G
chr1_5848323	5848323	42.49595016	efxeg	SNP	A,T
chr1_5848706	5848706	42.49704463	lmxll	SNP	C
chr1_5848734	5848734	42.52583078	nnxnp	SNP	A
chr1_5849620	5849620	42.54704558	nnxnp	SNP	T
chr1_5849634	5849634	42.54704558	nnxnp	SNP	G
chr1_5849881	5849881	42.60716666	lmxll	SNP	T
chr1_5850027	5850027	42.69521931	lmxll	SNP	C
chr1_5855081	5855081	42.69521931	lmxll	SNP	T
chr1_5855167	5855167	42.73133694	lmxll	SNP	C
chr1_5858607	5858607	42.7403626	lmxll	SNP	C
chr1_5858688	5858688	42.7403626	lmxll	SNP	A
chr1_5858690	5858690	42.74817384	lmxll	SNP	G
chr1_5858773	5858773	42.87516276	lmxll	SNP	C
chr1_5858795	5858795	42.87526771	lmxll	SNP	T
chr1_5858821	5858821	42.88337881	nnxnp	SNP	G
chr1_5858842	5858842	42.90844675	nnxnp	SNP	G
chr1_5859012	5859012	42.90844675	lmxll	SNP	T
chr1_5859852	5859852	42.90844675	nnxnp	SNP	C
chr1_5862730	5862730	42.90880658	lmxll	SNP	T
chr1_5862838	5862838	42.91648289	lmxll	SNP	T
chr1_5872323	5872323	42.91648289	nnxnp	SNP	C
chr1_5879373	5879373	42.97012709	nnxnp	SNP	C
chr1_5879401	5879401	43.07443192	nnxnp	SNP	G
chr1_5882368	5882368	43.07681577	nnxnp	SNP	A
chr1_5882375	5882375	43.09344277	nnxnp	SNP	T
chr1_5882416	5882416	43.10729611	lmxll	SNP	C
chr1_5882418	5882418	43.20220046	nnxnp	SNP	A
chr1_5883952	5883952	43.30125782	nnxnp	SNP	T
chr1_5883954	5883954	43.68870146	nnxnp	SNP	T
chr1_5883959	5883959	43.72883716	nnxnp	SNP	T
chr1_5884007	5884007	43.73218055	nnxnp	SNP	T
chr1_5884015	5884015	43.73218055	nnxnp	SNP	G
chr1_5889912	5889912	43.73218055	nnxnp	SNP	A,*
chr1_5904896	5904896	43.76099669	nnxnp	SNP	A
chr1_5914432	5914432	43.89888537	nnxnp	SNP	C
chr1_5915757	5915757	43.98395445	lmxll	SNP	T
chr1_5922720	5922720	43.99752293	lmxll	SNP	T
chr1_5924789	5924789	44.02572436	nnxnp	SNP	A
chr1_5924790	5924790	44.22217487	nnxnp	SNP	A
chr1_5928857	5928857	44.22971624	nnxnp	SNP	A
chr1_5929010	5929010	44.35896908	nnxnp	SNP	A
chr1_5929022	5929022	44.37772505	nnxnp	SNP	C
chr1_5929045	5929045	44.37772505	nnxnp	SNP	A
chr1_5929104	5929104	44.37772505	nnxnp	SNP	A
chr1_5931047	5931047	44.411099	nnxnp	SNP	G
chr1_5931202	5931202	44.46895617	nnxnp	SNP	C
chr1_5931221	5931221	44.46895617	nnxnp	INDEL	TG
chr1_5931389	5931389	44.46900115	nnxnp	SNP	C
chr1_5940848	5940848	44.51621344	hkxhk	SNP	T
chr1_5941068	5941068	44.52390474	nnxnp	SNP	C
chr1_5941943	5941943	44.52390474	nnxnp	SNP	T
chr1_5942027	5942027	44.52390474	nnxnp	SNP	T
chr1_5944960	5944960	44.55195625	lmxll	SNP	G
chr1_5947839	5947839	44.56131175	nnxnp	SNP	G
chr1_5947894	5947894	44.56131175	nnxnp	SNP	G
chr1_5952155	5952155	44.57807369	nnxnp	SNP	C
chr1_5952232	5952232	44.62177767	nnxnp	SNP	T
chr1_5952238	5952238	44.62177767	nnxnp	SNP	G
chr1_5952435	5952435	44.63665052	nnxnp	SNP	A
chr1_5990232	5990232	44.63665052	lmxll	SNP	A
chr1_5990254	5990254	44.63665052	nnxnp	SNP	C
chr1_5990255	5990255	44.63665052	nnxnp	SNP	T
chr1_5990261	5990261	44.66863013	nnxnp	INDEL	A
chr1_5992326	5992326	44.670984	lmxll	SNP	G
chr1_5992541	5992541	44.72013036	lmxll	SNP	G
chr1_5992694	5992694	44.73624761	lmxll	SNP	C
chr1_5993105	5993105	44.76548355	nnxnp	SNP	T
chr1_5993329	5993329	44.80602405	lmxll	SNP	A
chr1_5993550	5993550	44.80816802	lmxll	SNP	G
chr1_5993798	5993798	44.80816802	lmxll	SNP	T
chr1_5993915	5993915	44.80816802	lmxll	SNP	G
chr1_5997904	5997904	44.82846825	nnxnp	INDEL	CA
chr1_6007503	6007503	44.82846825	nnxnp	SNP	A
chr1_6007615	6007615	44.88124287	nnxnp	SNP	C
chr1_6017819	6017819	44.90791504	nnxnp	SNP	A
chr1_6019013	6019013	44.91616108	hkxhk	SNP	T
chr1_6019222	6019222	44.91755541	nnxnp	SNP	C
chr1_6019307	6019307	44.94220355	nnxnp	SNP	A
chr1_6019308	6019308	44.96742142	nnxnp	SNP	C
chr1_6025747	6025747	44.97529263	nnxnp	SNP	A
chr1_6029920	6029920	44.97589235	nnxnp	SNP	G
chr1_6029965	6029965	45.00929628	nnxnp	SNP	T
chr1_6032465	6032465	45.03175548	nnxnp	SNP	A
chr1_6032759	6032759	45.04229541	nnxnp	SNP	A
chr1_6034538	6034538	45.04268522	nnxnp	SNP	C
chr1_6036751	6036751	45.04268522	lmxll	SNP	A
chr1_6036972	6036972	45.0774535	lmxll	SNP	C
chr1_6041255	6041255	45.08010722	lmxll	INDEL	C
chr1_6066011	6066011	45.13471096	lmxll	SNP	G
chr1_6069208	6069208	45.1385791	nnxnp	SNP	C
chr1_6077270	6077270	45.1689245	nnxnp	SNP	A
chr1_6079735	6079735	45.19983963	nnxnp	SNP	T
chr1_6079736	6079736	45.19983963	nnxnp	SNP	G
chr1_6083068	6083068	45.20294314	nnxnp	SNP	G
chr1_6083381	6083381	45.2221489	lmxll	SNP	C
chr1_6089922	6089922	45.2283859	nnxnp	SNP	G
chr1_6094404	6094404	45.24726182	nnxnp	SNP	G
chr1_6094406	6094406	45.26478839	nnxnp	INDEL	AGT
chr1_6104684	6104684	45.26478839	nnxnp	SNP	A
chr1_6109858	6109858	45.26478839	lmxll	SNP	T
chr1_6109891	6109891	45.30778771	lmxll	SNP	C
chr1_6118608	6118608	45.31894234	lmxll	SNP	A
chr1_6123012	6123012	45.33281067	nnxnp	SNP	T
chr1_6123038	6123038	45.33281067	nnxnp	SNP	C
chr1_6123194	6123194	45.33741346	nnxnp	SNP	T
chr1_6125838	6125838	45.34768352	nnxnp	SNP	G
chr1_6125842	6125842	45.34768352	nnxnp	SNP	A
chr1_6126999	6126999	45.37102729	nnxnp	SNP	G
chr1_6127052	6127052	45.40915395	lmxll	SNP	A
chr1_6130816	6130816	45.40915395	nnxnp	SNP	A
chr1_6132570	6132570	45.41934905	nnxnp	SNP	G
chr1_6132649	6132649	45.42952915	nnxnp	SNP	C
chr1_6132653	6132653	45.42952915	nnxnp	SNP	C
chr1_6135067	6135067	45.42952915	lmxll	SNP	T
chr1_6136714	6136714	45.49017498	nnxnp	SNP	G
chr1_6144147	6144147	45.50007023	nnxnp	SNP	G
chr1_6144388	6144388	45.52765696	lmxll	SNP	C
chr1_6147226	6147226	45.5485569	lmxll	SNP	T
chr1_6152019	6152019	45.55824225	lmxll	SNP	T
chr1_6155639	6155639	45.56392451	lmxll	SNP	A
chr1_6160328	6160328	45.56563369	nnxnp	SNP	A
chr1_6160384	6160384	45.57920216	nnxnp	SNP	T
chr1_6160505	6160505	45.57920216	nnxnp	SNP	C
chr1_6160510	6160510	45.58684849	nnxnp	SNP	G
chr1_6161775	6161775	45.59969731	hkxhk	SNP	A
chr1_6166558	6166558	45.60987741	nnxnp	SNP	C
chr1_6166585	6166585	45.60987741	lmxll	SNP	G
chr1_6166646	6166646	45.63037255	nnxnp	SNP	A
chr1_6166668	6166668	45.63490037	nnxnp	SNP	T
chr1_6166719	6166719	45.63633968	nnxnp	SNP	A
chr1_6166721	6166721	45.6512725	nnxnp	SNP	G
chr1_6169268	6169268	45.80662778	lmxll	SNP	A
chr1_6172691	6172691	45.80895166	nnxnp	SNP	C
chr1_6185016	6185016	45.83623853	nnxnp	SNP	T
chr1_6193374	6193374	45.89084227	nnxnp	INDEL	AT
chr1_6193489	6193489	45.93940391	nnxnp	SNP	A
chr1_6193507	6193507	46.0593912	nnxnp	SNP	G
chr1_6193524	6193524	46.15167182	nnxnp	SNP	C
chr1_6193525	6193525	46.19452121	nnxnp	SNP	G
chr1_6193600	6193600	46.19462616	nnxnp	SNP	T
chr1_6199703	6199703	46.39161641	lmxll	SNP	A
chr1_6205681	6205681	46.39471991	nnxnp	SNP	T
chr1_6217425	6217425	46.39618921	nnxnp	SNP	A
chr1_6222593	6222593	46.39780843	lmxll	SNP	G
chr1_6222614	6222614	46.39891789	lmxll	SNP	A
chr1_6222629	6222629	46.3999374	lmxll	SNP	G
chr1_6222657	6222657	46.41795874	lmxll	SNP	G
chr1_6222867	6222867	46.5319639	nnxnp	SNP	G
chr1_6222898	6222898	46.53323829	lmxll	SNP	G
chr1_6227817	6227817	46.53748125	lmxll	SNP	T
chr1_6228843	6228843	46.54143934	nnxnp	SNP	G
chr1_6234732	6234732	46.64093149	lmxll	SNP	T
chr1_6245533	6245533	46.64096148	lmxll	SNP	C
chr1_6272506	6272506	46.64100645	nnxnp	SNP	C
chr1_6272634	6272634	46.70622508	lmxll	SNP	G
chr1_6272653	6272653	46.74687054	lmxll	INDEL	T
chr1_6272668	6272668	46.76391734	hkxhk	SNP	A
chr1_6274889	6274889	46.77655626	lmxll	SNP	C
chr1_6287009	6287009	46.83681227	lmxll	SNP	C
chr1_6287087	6287087	47.01248278	lmxll	SNP	C
chr1_6289311	6289311	47.02264789	nnxnp	SNP	A
chr1_6290046	6290046	47.08504788	nnxnp	SNP	T
chr1_6306472	6306472	47.09375869	nnxnp	SNP	C
chr1_6320127	6320127	47.09746191	hkxhk	SNP	G
chr1_6320947	6320947	47.0976868	nnxnp	SNP	A
chr1_6324124	6324124	47.0976868	nnxnp	SNP	A
chr1_6324129	6324129	47.12008602	nnxnp	SNP	G
chr1_6324219	6324219	47.12893177	lmxll	SNP	T
chr1_6324224	6324224	47.14615848	lmxll	SNP	C
chr1_6324726	6324726	47.17163123	nnxnp	SNP	A
chr1_6330612	6330612	47.22752435	lmxll	SNP	T
chr1_6330645	6330645	47.25262228	lmxll	SNP	T
chr1_6330651	6330651	47.32185898	lmxll	SNP	C
chr1_6330726	6330726	47.34191933	lmxll	SNP	C
chr1_6332828	6332828	47.37517333	nnxnp	INDEL	CT
chr1_6339626	6339626	47.41144089	nnxnp	SNP	C
chr1_6339663	6339663	47.41144089	nnxnp	SNP	A
chr1_6343305	6343305	47.41144089	nnxnp	SNP	G
chr1_6343325	6343325	47.41845751	nnxnp	SNP	A
chr1_6343377	6343377	47.49489075	lmxll	SNP	G
chr1_6343415	6343415	47.49489075	nnxnp	SNP	T
chr1_6351234	6351234	47.51322693	lmxll	SNP	C
chr1_6351292	6351292	47.52442654	lmxll	SNP	A
chr1_6372924	6372924	47.52442654	nnxnp	INDEL	A
chr1_6372944	6372944	47.56571668	nnxnp	INDEL	CT
chr1_6373942	6373942	47.59076963	nnxnp	SNP	A
chr1_6382764	6382764	47.59076963	lmxll	SNP	C
chr1_6382920	6382920	47.60717174	lmxll	SNP	T
chr1_6383869	6383869	47.61513292	nnxnp	SNP	C
chr1_6383893	6383893	47.6334691	nnxnp	SNP	C
chr1_6387590	6387590	47.6334691	nnxnp	SNP	A
chr1_6390317	6390317	47.64564324	nnxnp	SNP	A
chr1_6390333	6390333	47.64564324	nnxnp	SNP	A
chr1_6390690	6390690	47.64564324	nnxnp	SNP	A
chr1_6390915	6390915	47.68015664	lmxll	SNP	T
chr1_6391425	6391425	47.68799787	lmxll	INDEL	C
chr1_6393005	6393005	47.6962439	nnxnp	INDEL	G
chr1_6393196	6393196	47.71045707	lmxll	SNP	G
chr1_6397825	6397825	47.72940795	nnxnp	INDEL	T
chr1_6397831	6397831	47.74048762	nnxnp	INDEL	TATACTAC
chr1_6403967	6403967	47.74985811	lmxll	SNP	C
chr1_6410605	6410605	47.7498881	nnxnp	INDEL	ACAT
chr1_6410618	6410618	47.77320189	nnxnp	SNP	T
chr1_6410656	6410656	47.78048838	nnxnp	SNP	T
chr1_6410662	6410662	47.78654547	nnxnp	SNP	C
chr1_6413667	6413667	47.83381773	lmxll	SNP	T,*
chr1_6413763	6413763	47.84276843	nnxnp	SNP	G
chr1_6420256	6420256	47.87369855	nnxnp	SNP	A
chr1_6421612	6421612	47.87369855	nnxnp	SNP	C
chr1_6435624	6435624	47.87954574	nnxnp	SNP	T
chr1_6435766	6435766	47.87974064	nnxnp	SNP	A
chr1_6435820	6435820	47.89809182	nnxnp	SNP	G
chr1_6441250	6441250	47.92689296	nnxnp	SNP	C
chr1_6449810	6449810	47.94193073	lmxll	SNP	C
chr1_6450073	6450073	47.94193073	nnxnp	SNP	T
chr1_6450084	6450084	47.99723913	nnxnp	INDEL	CT
chr1_6450092	6450092	48.01735945	lmxll	SNP	G
chr1_6452992	6452992	48.01735945	nnxnp	SNP	T
chr1_6452995	6452995	48.0792047	nnxnp	INDEL	G
chr1_6453174	6453174	48.08073397	nnxnp	SNP	T
chr1_6453193	6453193	48.09403257	nnxnp	SNP	C
chr1_6453217	6453217	48.09403257	nnxnp	SNP	C
chr1_6453221	6453221	48.17157528	nnxnp	SNP	T
chr1_6453244	6453244	48.17157528	nnxnp	SNP	T
chr1_6454478	6454478	48.19279007	lmxll	SNP	A
chr1_6454535	6454535	48.20827762	lmxll	SNP	A
chr1_6455055	6455055	48.20827762	nnxnp	SNP	A
chr1_6455076	6455076	48.24351068	nnxnp	SNP	C
chr1_6459451	6459451	48.25770885	nnxnp	SNP	A
chr1_6459529	6459529	48.25770885	nnxnp	SNP	G
chr1_6459624	6459624	48.25770885	nnxnp	INDEL	C
chr1_6459630	6459630	48.27800908	nnxnp	INDEL	ACT
chr1_6462099	6462099	48.28889385	nnxnp	SNP	T
chr1_6462115	6462115	48.34454708	nnxnp	SNP	G
chr1_6462138	6462138	48.35123386	nnxnp	SNP	G
chr1_6463355	6463355	48.35123386	nnxnp	SNP	A
chr1_6463406	6463406	48.38217898	nnxnp	SNP	C
chr1_6468500	6468500	48.38217898	nnxnp	SNP	G
chr1_6474799	6474799	48.38217898	nnxnp	SNP	T
chr1_6481442	6481442	48.4318201	hkxhk	SNP	C
chr1_6481768	6481768	48.43856686	hkxhk	SNP	C
chr1_6481784	6481784	48.44462394	hkxhk	SNP	A
chr1_6482067	6482067	48.44462394	lmxll	SNP	T
chr1_6516619	6516619	48.44462394	nnxnp	SNP	G
chr1_6516628	6516628	48.45236022	nnxnp	SNP	A
chr1_6516654	6516654	48.46038136	nnxnp	SNP	G
chr1_6516677	6516677	48.51354579	nnxnp	SNP	G
chr1_6557485	6557485	48.51354579	lmxll	SNP	A
chr1_6558630	6558630	48.51354579	nnxnp	SNP	A
chr1_6560018	6560018	48.53816395	nnxnp	SNP	T
chr1_6560036	6560036	48.63558709	nnxnp	SNP	A
chr1_6568526	6568526	48.66143466	nnxnp	SNP	A
chr1_6568633	6568633	48.66143466	nnxnp	SNP	G
chr1_6572188	6572188	48.70136046	nnxnp	SNP	G
chr1_6572422	6572422	48.71107579	nnxnp	SNP	T
chr1_6572432	6572432	48.73570894	nnxnp	SNP	T
chr1_6572454	6572454	48.74957727	nnxnp	SNP	G
chr1_6572457	6572457	48.75185617	nnxnp	INDEL	G
chr1_6574071	6574071	48.85683568	nnxnp	SNP	G
chr1_6574112	6574112	48.8942127	nnxnp	SNP	T
chr1_6583828	6583828	48.90025479	lmxll	SNP	G
chr1_6583855	6583855	48.99718317	nnxnp	INDEL	C
chr1_6584025	6584025	48.99839759	nnxnp	SNP	A
chr1_6584034	6584034	48.99989687	lmxll	SNP	A
chr1_6584062	6584062	49.01357029	nnxnp	SNP	C
chr1_6584096	6584096	49.01961238	lmxll	INDEL	CTG
chr1_6587478	6587478	49.01961238	nnxnp	SNP	T
chr1_6589964	6589964	49.0559699	lmxll	SNP	A
chr1_6590610	6590610	49.06295654	lmxll	SNP	T
chr1_6590629	6590629	49.06295654	lmxll	SNP	T
chr1_6593864	6593864	49.07514567	nnxnp	SNP	T
chr1_6593875	6593875	49.07517566	lmxll	SNP	A
chr1_6593910	6593910	49.16342321	lmxll	SNP	A
chr1_6602438	6602438	49.17402312	nnxnp	INDEL	G
chr1_6602455	6602455	49.17402312	nnxnp	SNP	A
chr1_6602484	6602484	49.1875616	nnxnp	SNP	A
chr1_6602493	6602493	49.18955564	lmxll	INDEL	GGA
chr1_6603971	6603971	49.20501321	nnxnp	SNP	T
chr1_6604188	6604188	49.20501321	nnxnp	INDEL	TC
chr1_6604277	6604277	49.22336438	lmxll	INDEL	A
chr1_6605982	6605982	49.22336438	nnxnp	SNP	G
chr1_6605985	6605985	49.24319984	nnxnp	SNP	G
chr1_6605998	6605998	49.2538897	nnxnp	INDEL	CTT
chr1_6606008	6606008	49.27481963	nnxnp	SNP	G
chr1_6606148	6606148	49.29685903	lmxll	SNP	T
chr1_6606177	6606177	49.29685903	nnxnp	INDEL	AG
chr1_6606200	6606200	49.30978282	nnxnp	SNP	T
chr1_6614699	6614699	49.31243654	lmxll	SNP	G
chr1_6614726	6614726	49.35224239	lmxll	SNP	G
chr1_6618292	6618292	49.36585585	nnxnp	SNP	T
chr1_6618324	6618324	49.37810496	lmxll	INDEL	TA
chr1_6618365	6618365	49.48428388	nnxnp	SNP	G
chr1_6618388	6618388	49.48428388	nnxnp	SNP	A
chr1_6622123	6622123	49.49749253	nnxnp	SNP	G
chr1_6622135	6622135	49.50402939	nnxnp	SNP	A
chr1_6622173	6622173	49.54626407	nnxnp	SNP	G
chr1_6628039	6628039	49.54626407	nnxnp	SNP	C
chr1_6628583	6628583	49.57380583	nnxnp	SNP	A
chr1_6658691	6658691	49.60185733	nnxnp	SNP	A
chr1_6658700	6658700	49.60860409	nnxnp	SNP	A
chr1_6681483	6681483	49.70944559	lmxll	SNP	T
chr1_6683891	6683891	49.71146961	nnxnp	SNP	A
chr1_6683895	6683895	49.8447705	nnxnp	SNP	T
chr1_6683945	6683945	49.85091754	nnxnp	SNP	C
chr1_6683950	6683950	49.86301672	nnxnp	SNP	T
chr1_6687066	6687066	49.97871607	nnxnp	SNP	A
chr1_6690464	6690464	50.02910683	nnxnp	SNP	T
chr1_6691385	6691385	50.04343994	lmxll	SNP	G
chr1_6713244	6713244	50.05408482	lmxll	SNP	G
chr1_6713330	6713330	50.06225589	nnxnp	SNP	G
chr1_6713343	6713343	50.06225589	lmxll	SNP	C
chr1_6730873	6730873	50.07649904	nnxnp	SNP	T
chr1_6731116	6731116	50.10528519	nnxnp	SNP	C
chr1_6731119	6731119	50.10528519	nnxnp	INDEL	TA
chr1_6731123	6731123	50.10528519	nnxnp	INDEL	C,CTT
chr1_6744960	6744960	50.11888365	nnxnp	SNP	G
chr1_6744993	6744993	50.12054785	nnxnp	SNP	A
chr1_6749144	6749144	50.15584088	nnxnp	SNP	A
chr1_6749189	6749189	50.15584088	nnxnp	SNP	G
chr1_6749206	6749206	50.16800003	nnxnp	SNP	C
chr1_6749324	6749324	50.16800003	nnxnp	SNP	T
chr1_6751923	6751923	50.18015918	nnxnp	SNP	C
chr1_6763829	6763829	50.20659147	nnxnp	SNP	A
chr1_6763976	6763976	50.21977013	nnxnp	SNP	T
chr1_6764069	6764069	50.23989045	nnxnp	SNP	C
chr1_6770130	6770130	50.25986085	nnxnp	SNP	T
chr1_6770140	6770140	50.25986085	nnxnp	SNP	G
chr1_6770164	6770164	50.27202	nnxnp	SNP	C
chr1_6770229	6770229	50.27202	nnxnp	SNP	A
chr1_6778200	6778200	50.29037117	nnxnp	SNP	A
chr1_6778209	6778209	50.29037117	nnxnp	SNP	G
chr1_6778410	6778410	50.33424007	nnxnp	SNP	A
chr1_6778413	6778413	50.37163209	nnxnp	SNP	C
chr1_6779595	6779595	50.38996827	lmxll	SNP	C
chr1_6779646	6779646	50.38996827	lmxll	SNP	T
chr1_6779697	6779697	50.39711983	nnxnp	SNP	G
chr1_6788526	6788526	50.42307234	lmxll	SNP	A
chr1_6788633	6788633	50.43446686	lmxll	SNP	T
chr1_6788645	6788645	50.46368781	nnxnp	SNP	C
chr1_6788658	6788658	50.46368781	lmxll	SNP	A
chr1_6788822	6788822	50.49224907	lmxll	SNP	A
chr1_6788856	6788856	50.50604244	lmxll	SNP	G
chr1_6796913	6796913	50.51473825	lmxll	SNP	T
chr1_6800307	6800307	50.53311941	nnxnp	SNP	A
chr1_6802452	6802452	50.55563858	lmxll	SNP	A
chr1_6805183	6805183	50.57398975	nnxnp	SNP	A
chr1_6807165	6807165	50.57398975	lmxll	SNP	A
chr1_6807213	6807213	50.57398975	nnxnp	SNP	A
chr1_6807646	6807646	50.58614891	nnxnp	SNP	A
chr1_6807671	6807671	50.58614891	nnxnp	SNP	G
chr1_6807794	6807794	50.60462002	nnxnp	SNP	T
chr1_6807803	6807803	50.62285125	lmxll	SNP	C
chr1_6809929	6809929	50.62285125	nnxnp	SNP	A
chr1_6809994	6809994	50.6350104	lmxll	SNP	A
chr1_6816153	6816153	50.64716956	nnxnp	INDEL	T
chr1_6816154	6816154	50.64716956	nnxnp	INDEL	A,*
chr1_6816155	6816155	50.66520588	nnxnp	SNP	C,*
chr1_6816158	6816158	50.67447142	nnxnp	INDEL	CAAAT
chr1_6816188	6816188	50.73396281	nnxnp	SNP	G
chr1_6824672	6824672	50.74711149	lmxll	SNP	A
chr1_6825816	6825816	50.79663267	nnxnp	SNP	T
chr1_6825867	6825867	50.80349936	nnxnp	SNP	A
chr1_6828844	6828844	50.80349936	nnxnp	SNP	T
chr1_6828860	6828860	50.82967677	nnxnp	SNP	C
chr1_6831370	6831370	50.84030666	nnxnp	SNP	G
chr1_6831441	6831441	50.86490983	nnxnp	SNP	T
chr1_6831443	6831443	50.86493981	nnxnp	SNP	G
chr1_6831445	6831445	50.89263149	nnxnp	SNP	A
chr1_6831455	6831455	50.90182207	nnxnp	SNP	G
chr1_6831590	6831590	50.9161102	nnxnp	INDEL	G
chr1_6835632	6835632	51.00764118	lmxll	SNP	G
chr1_6835633	6835633	51.01395314	nnxnp	SNP	A
chr1_6835775	6835775	51.01395314	lmxll	SNP	G
chr1_6835840	6835840	51.02882599	lmxll	SNP	A
chr1_6840988	6840988	51.05073045	nnxnp	SNP	C
chr1_6841203	6841203	51.05073045	nnxnp	SNP	T
chr1_6841227	6841227	51.08113583	nnxnp	SNP	C
chr1_6851438	6851438	51.09281521	nnxnp	SNP	T
chr1_6863742	6863742	51.12807825	nnxnp	SNP	G
chr1_6864840	6864840	51.13232121	nnxnp	SNP	G
chr1_6865338	6865338	51.13518483	nnxnp	SNP	G
chr1_6865350	6865350	51.13831832	nnxnp	SNP	A
chr1_6871487	6871487	51.14238137	lmxll	SNP	A
chr1_6875309	6875309	51.15454052	nnxnp	SNP	A
chr1_6875410	6875410	51.15454052	lmxll	SNP	G
chr1_6879825	6879825	51.15454052	hkxhk	SNP	T
chr1_6879832	6879832	51.15454052	hkxhk	SNP	C
chr1_6879893	6879893	51.16131726	hkxhk	SNP	T
chr1_6879908	6879908	51.22367227	lmxll	INDEL	AT
chr1_6881596	6881596	51.23028409	nnxnp	SNP	C
chr1_6881608	6881608	51.23634117	nnxnp	SNP	A
chr1_6881690	6881690	51.23634117	nnxnp	SNP	A
chr1_6884379	6884379	51.23634117	nnxnp	SNP	C
chr1_6886620	6886620	51.26094434	nnxnp	INDEL	TA
chr1_6886832	6886832	51.27320844	efxeg	SNP	A,T
chr1_6890493	6890493	51.2847379	nnxnp	SNP	A
[truncated: 68,062 more rows]
